# Supplementary material for: DLX1 acts as a novel prognostic biomarker involved in immune cell infiltration and tumor progression in lung adenocarcinoma
Source: PeerJ. 2024 Feb 2;12:e16823. doi: 10.7717/peerj.16823 (PMC10840498; doi:10.7717/peerj.16823)
Supplement: Supplemental Information 3 [file peerj-12-16823-s003.xlsx]

## Sheet: Sheet1
H1299
	NC	DLX1 si#1	DLX1 si#2
	0.763503	0.523034	0.583456
	0.876697	0.59322	0.23019
	0.840112	0.33629	0.296992
A549
	NC	DLX1 si#1	DLX1 si#2
	0.795806	0.161117	0.173584
	0.782882	0.126333	0.175554
	0.772236	0.191994	0.151299
