# Supplementary material for: DLX1 acts as a novel prognostic biomarker involved in immune cell infiltration and tumor progression in lung adenocarcinoma
Source: PeerJ. 2024 Feb 2;12:e16823. doi: 10.7717/peerj.16823 (PMC10840498; doi:10.7717/peerj.16823)
Supplement: Supplemental Information 7 [file peerj-12-16823-s007.xlsx]

## Sheet: Sheet1
H1299	hours	NC			DLX1 si#1			DLX1 si#2
	0	0.094733	0.094459	0.097568	0.10195	0.100737	0.0988	0.101903	0.099302	0.100037
	24	0.247468	0.226507	0.248829	0.175597	0.174582	0.17728	0.195489	0.177553	0.206824
	48	0.520075	0.612645	0.44816	0.264991	0.277565	0.277781	0.389246	0.383236	0.416761
	72	1.21589	1.29378	1.15387	0.773708	0.766378	0.758783	0.763337	0.947223	1.09358
	96	2.00608	2.09503	2.04775	1.38024	1.3876	1.30463	1.66221	1.42907	1.5024
A549
	hours	NC			DLX1 si#1			DLX1 si#2
	0	0.094549	0.094677	0.094662	0.094746	0.094849	0.094259	0.094575	0.09432	0.093612
	24	0.26645	0.25098	0.245451	0.173214	0.188141	0.200222	0.242875	0.244827	0.253824
	48	0.978907	1.04912	1.09342	0.392507	0.41077	0.413408	0.617749	0.645791	0.642795
	72	1.84747	2.04096	1.83065	0.96228	1.03528	0.865741	1.25877	1.31077	1.08217
	96	3.62615	3.46069	3.16387	2.40803	2.41293	2.60463	2.62931	2.60429	2.79117
