# Supplementary material for: DLX1 acts as a novel prognostic biomarker involved in immune cell infiltration and tumor progression in lung adenocarcinoma
Source: PeerJ. 2024 Feb 2;12:e16823. doi: 10.7717/peerj.16823 (PMC10840498; doi:10.7717/peerj.16823)
Supplement: Supplemental Information 8 [file peerj-12-16823-s008.xlsx]

## Sheet: Sheet1
Beas-2B	HCC827	SPCA1	A549	H1299
1.09558	1.44037	1.46233	2.0777	2.21017
0.979444	1.22328	1.6738	1.82585	3.00974
0.931913	1.24452	2.16431	2.35749	2.75511
