# Supplementary material for: DLX1 acts as a novel prognostic biomarker involved in immune cell infiltration and tumor progression in lung adenocarcinoma
Source: PeerJ. 2024 Feb 2;12:e16823. doi: 10.7717/peerj.16823 (PMC10840498; doi:10.7717/peerj.16823)
Supplement: Supplemental Information 9 [file peerj-12-16823-s009.xls]

## Sheet: Results
Block Type	96alum
Chemistry	SYBR_GREEN
Experiment File Name	D:\DATA\WANGJUAN\20220917zdh.eds
Experiment Run End Time	2023-11-25 13:44:56 PM CST
Instrument Type	sds7500
Passive Reference	ROX
Well	Sample Name	Target Name	Task	Reporter	Quencher	RQ	RQ Min	RQ Max	Cт	Cт Mean	Cт SD	ΔCт	ΔCт Mean	ΔCт SE	HK Control ΔCт Mean	HK Control ΔCт SE	ΔΔCт	Automatic Ct Threshold	Ct Threshold	Automatic Baseline	Baseline Start	Baseline End	Efficiency	Tm1	Tm2	Tm3	Comments	HIGHSD	EXPFAIL
A1	beas-2b-0916	18s	UNKNOWN	SYBR	None				9.68785	9.66559	0.0677651							TRUE	0.418294	TRUE	1	2	1	82.805				N	N
A2	beas-2b-0916	18s	UNKNOWN	SYBR	None				9.58949	9.66559	0.0677651							TRUE	0.418294	TRUE	1	2	1	82.9899				N	N
A3	beas-2b-0916	18s	UNKNOWN	SYBR	None				9.71942	9.66559	0.0677651							TRUE	0.418294	TRUE	1	2	1	82.9899				N	N
A4	beas-2b-0916	AC025569.1	UNKNOWN	SYBR	None	1			Undetermined	38.4369			28.7713				0	TRUE	0.314032	TRUE	3	44	1	63.7587				N	Y
A5	beas-2b-0916	AC025569.1	UNKNOWN	SYBR	None	1			38.4369	38.4369			28.7713				0	TRUE	0.314032	TRUE	3	32	1	79.4765				N	N
A6	beas-2b-0916	AC025569.1	UNKNOWN	SYBR	None	1			Undetermined	38.4369			28.7713				0	TRUE	0.314032	TRUE	3	44	1	61.9095				N	Y
A7	A549-NC	ACtin	UNKNOWN	SYBR	None				16.3433	16.4686	0.11213							TRUE	0.334831	TRUE	3	10	1	87.0581				N	N
A8	A549-NC	ACtin	UNKNOWN	SYBR	None				16.5029	16.4686	0.11213							TRUE	0.334831	TRUE	3	11	1	87.0581				N	N
A9	A549-NC	ACtin	UNKNOWN	SYBR	None				16.5596	16.4686	0.11213							TRUE	0.334831	TRUE	3	11	1	86.8732				N	N
A10	A549-NC	DLX1	UNKNOWN	SYBR	None				33.5008	33.63	0.120464							TRUE	0.264895	TRUE	3	28	1	88.1676				N	N
A11	A549-NC	DLX1	UNKNOWN	SYBR	None				33.7392	33.63	0.120464							TRUE	0.264895	TRUE	3	28	1	87.9827				N	N
A12	A549-NC	DLX1	UNKNOWN	SYBR	None				33.65	33.63	0.120464							TRUE	0.264895	TRUE	3	28	1	87.9827				N	N
B1	A549	18s	UNKNOWN	SYBR	None				9.59902	9.60598	0.0800394							TRUE	0.418294	TRUE	1	2	1	82.9899				N	N
B2	A549	18s	UNKNOWN	SYBR	None				9.52965	9.60598	0.0800394							TRUE	0.418294	TRUE	1	2	1	83.1749				N	N
B3	A549	18s	UNKNOWN	SYBR	None				9.68927	9.60598	0.0800394							TRUE	0.418294	TRUE	3	4	1	83.1749				N	N
B4	A549	AC025569.1	UNKNOWN	SYBR	None	2.65342	0.291484	24.1544	Undetermined	36.9694	1.41445		27.3635	1.00123			-1.40785	TRUE	0.314032	TRUE	3	44	1	65.4229				N	Y
B5	A549	AC025569.1	UNKNOWN	SYBR	None	2.65342	0.291484	24.1544	35.9693	36.9694	1.41445		27.3635	1.00123			-1.40785	TRUE	0.314032	TRUE	3	30	1	79.4765				Y	N
B6	A549	AC025569.1	UNKNOWN	SYBR	None	2.65342	0.291484	24.1544	37.9696	36.9694	1.41445		27.3635	1.00123			-1.40785	TRUE	0.314032	TRUE	3	32	1	79.6615				Y	N
B7	A549-D1	ACtin	UNKNOWN	SYBR	None				16.3266	16.3854	0.0541876							TRUE	0.334831	TRUE	3	9	1	87.243				N	N
B8	A549-D1	ACtin	UNKNOWN	SYBR	None				16.4333	16.3854	0.0541876							TRUE	0.334831	TRUE	3	10	1	87.0581				N	N
B9	A549-D1	ACtin	UNKNOWN	SYBR	None				16.3964	16.3854	0.0541876							TRUE	0.334831	TRUE	3	11	1	87.0581				N	N
B10	A549-D1	DLX1	UNKNOWN	SYBR	None				33.5331	33.7915	0.500915							TRUE	0.264895	TRUE	3	28	1	87.9827				Y	N
B11	A549-D1	DLX1	UNKNOWN	SYBR	None				34.3689	33.7915	0.500915							TRUE	0.264895	TRUE	3	29	1	88.1676				Y	N
B12	A549-D1	DLX1	UNKNOWN	SYBR	None				33.4726	33.7915	0.500915							TRUE	0.264895	TRUE	3	27	1	87.7978				Y	N
C1	SPCA-1	18s	UNKNOWN	SYBR	None				9.32246	9.2973	0.0396697							TRUE	0.418294	TRUE	1	2	1	82.9899				N	N
C2	SPCA-1	18s	UNKNOWN	SYBR	None				9.31788	9.2973	0.0396697							TRUE	0.418294	TRUE	1	2	1	82.9899				N	N
C3	SPCA-1	18s	UNKNOWN	SYBR	None				9.25157	9.2973	0.0396697							TRUE	0.418294	TRUE	1	2	1	83.1749				N	N
C4	SPCA-1	AC025569.1	UNKNOWN	SYBR	None	287.185	232.974	354.01	29.8938	29.9028	0.184055		20.6055	0.108704			-8.16584	TRUE	0.314032	TRUE	3	24	1	79.6615				N	N
C5	SPCA-1	AC025569.1	UNKNOWN	SYBR	None	287.185	232.974	354.01	30.0912	29.9028	0.184055		20.6055	0.108704			-8.16584	TRUE	0.314032	TRUE	3	24	1	79.6615				N	N
C6	SPCA-1	AC025569.1	UNKNOWN	SYBR	None	287.185	232.974	354.01	29.7234	29.9028	0.184055		20.6055	0.108704			-8.16584	TRUE	0.314032	TRUE	3	24	1	79.6615				N	N
C7	A549-D2	ACtin	UNKNOWN	SYBR	None				16.2965	16.2675	0.0260036							TRUE	0.334831	TRUE	3	10	1	87.243				N	N
C8	A549-D2	ACtin	UNKNOWN	SYBR	None				16.2463	16.2675	0.0260036							TRUE	0.334831	TRUE	3	10	1	87.243				N	N
C9	A549-D2	ACtin	UNKNOWN	SYBR	None				16.2598	16.2675	0.0260036							TRUE	0.334831	TRUE	3	10	1	87.243				N	N
C10	A549-D2	DLX1	UNKNOWN	SYBR	None				33.1633	33.8117	0.56693							TRUE	0.264895	TRUE	3	28	1	88.1676				Y	N
C11	A549-D2	DLX1	UNKNOWN	SYBR	None				34.2141	33.8117	0.56693							TRUE	0.264895	TRUE	3	29	1	88.1676				Y	N
C12	A549-D2	DLX1	UNKNOWN	SYBR	None				34.0576	33.8117	0.56693							TRUE	0.264895	TRUE	3	28	1	87.9827				Y	N
D1	H1299	18s	UNKNOWN	SYBR	None				9.10319	9.05399	0.0442605							TRUE	0.418294	TRUE	1	2	1	82.9899				N	N
D2	H1299	18s	UNKNOWN	SYBR	None				9.04137	9.05399	0.0442605							TRUE	0.418294	TRUE	1	2	1	83.1749				N	N
D3	H1299	18s	UNKNOWN	SYBR	None				9.01741	9.05399	0.0442605							TRUE	0.418294	TRUE	1	2	1	83.1749				N	N
D4	H1299	AC025569.1	UNKNOWN	SYBR	None	1560.9	1446.06	1684.85	27.2205	27.2172	0.0526441		18.1632	0.0397089			-10.6082	TRUE	0.314032	TRUE	3	21	1	79.6615				N	N
D5	H1299	AC025569.1	UNKNOWN	SYBR	None	1560.9	1446.06	1684.85	27.268	27.2172	0.0526441		18.1632	0.0397089			-10.6082	TRUE	0.314032	TRUE	3	22	1	79.6615				N	N
D6	H1299	AC025569.1	UNKNOWN	SYBR	None	1560.9	1446.06	1684.85	27.1629	27.2172	0.0526441		18.1632	0.0397089			-10.6082	TRUE	0.314032	TRUE	3	21	1	79.6615				N	N
D7	A549-D6	ACtin	UNKNOWN	SYBR	None				16.1756	16.1476	0.029472							TRUE	0.334831	TRUE	3	10	1	87.4279				N	N
D8	A549-D6	ACtin	UNKNOWN	SYBR	None				16.1168	16.1476	0.029472							TRUE	0.334831	TRUE	3	10	1	87.243				N	N
D9	A549-D6	ACtin	UNKNOWN	SYBR	None				16.1503	16.1476	0.029472							TRUE	0.334831	TRUE	3	10	1	87.243				N	N
D10	A549-D6	DLX1	UNKNOWN	SYBR	None				34.8513	34.7652	0.10553							TRUE	0.264895	TRUE	3	29	1	88.1676				N	N
D11	A549-D6	DLX1	UNKNOWN	SYBR	None				34.6475	34.7652	0.10553							TRUE	0.264895	TRUE	3	29	1	87.9827				N	N
D12	A549-D6	DLX1	UNKNOWN	SYBR	None				34.797	34.7652	0.10553							TRUE	0.264895	TRUE	3	28	1	87.7978				N	N
E1	H1975	18s	UNKNOWN	SYBR	None				9.67506	9.86827	0.168183							TRUE	0.418294	TRUE	1	2	1	82.805				N	N
E2	H1975	18s	UNKNOWN	SYBR	None				9.94786	9.86827	0.168183							TRUE	0.418294	TRUE	3	4	1	82.805				N	N
E3	H1975	18s	UNKNOWN	SYBR	None				9.98188	9.86827	0.168183							TRUE	0.418294	TRUE	3	4	1	82.9899				N	N
E4	H1975	AC025569.1	UNKNOWN	SYBR	None	1414.84	1151.57	1738.3	28.1819	28.1732	0.0777896		18.3049	0.106984			-10.4664	TRUE	0.314032	TRUE	3	22	1	79.6615				N	N
E5	H1975	AC025569.1	UNKNOWN	SYBR	None	1414.84	1151.57	1738.3	28.0914	28.1732	0.0777896		18.3049	0.106984			-10.4664	TRUE	0.314032	TRUE	3	22	1	79.4765				N	N
E6	H1975	AC025569.1	UNKNOWN	SYBR	None	1414.84	1151.57	1738.3	28.2462	28.1732	0.0777896		18.3049	0.106984			-10.4664	TRUE	0.314032	TRUE	3	22	1	79.6615				N	N
E7	H1299-NC	ACtin	UNKNOWN	SYBR	None				15.7904	15.8641	0.074319							TRUE	0.334831	TRUE	3	9	1	87.4279				N	N
E8	H1299-NC	ACtin	UNKNOWN	SYBR	None				15.8628	15.8641	0.074319							TRUE	0.334831	TRUE	3	9	1	87.243				N	N
E9	H1299-NC	ACtin	UNKNOWN	SYBR	None				15.9391	15.8641	0.074319							TRUE	0.334831	TRUE	3	10	1	87.243				N	N
E10	H1299-NC	DLX1	UNKNOWN	SYBR	None				29.3989	29.7772	0.374161							TRUE	0.264895	TRUE	3	23	1	88.1676				N	N
E11	H1299-NC	DLX1	UNKNOWN	SYBR	None				29.7855	29.7772	0.374161							TRUE	0.264895	TRUE	3	24	1	88.1676				N	N
E12	H1299-NC	DLX1	UNKNOWN	SYBR	None				30.1471	29.7772	0.374161							TRUE	0.264895	TRUE	3	24	1	87.9827				N	N
F1	HCC827	18s	UNKNOWN	SYBR	None				9.72314	9.76834	0.0422277							TRUE	0.418294	TRUE	1	2	1	82.4352				N	N
F2	HCC827	18s	UNKNOWN	SYBR	None				9.77509	9.76834	0.0422277							TRUE	0.418294	TRUE	1	2	1	82.805				N	N
F3	HCC827	18s	UNKNOWN	SYBR	None				9.80679	9.76834	0.0422277							TRUE	0.418294	TRUE	3	4	1	82.9899				N	N
F4	HCC827	AC025569.1	UNKNOWN	SYBR	None	108.251	85.924	136.381	31.5551	31.7814	0.203562		22.0131	0.120029			-6.75824	TRUE	0.314032	TRUE	3	25	1	79.4765				N	N
F5	HCC827	AC025569.1	UNKNOWN	SYBR	None	108.251	85.924	136.381	31.8396	31.7814	0.203562		22.0131	0.120029			-6.75824	TRUE	0.314032	TRUE	3	26	1	79.6615				N	N
F6	HCC827	AC025569.1	UNKNOWN	SYBR	None	108.251	85.924	136.381	31.9496	31.7814	0.203562		22.0131	0.120029			-6.75824	TRUE	0.314032	TRUE	3	26	1	79.6615				N	N
F7	H1299-D1	ACtin	UNKNOWN	SYBR	None				15.9083	15.9288	0.0523927							TRUE	0.334831	TRUE	3	10	1	87.243				N	N
F8	H1299-D1	ACtin	UNKNOWN	SYBR	None				15.8897	15.9288	0.0523927							TRUE	0.334831	TRUE	3	9	1	87.243				N	N
F9	H1299-D1	ACtin	UNKNOWN	SYBR	None				15.9883	15.9288	0.0523927							TRUE	0.334831	TRUE	3	10	1	87.243				N	N
F10	H1299-D1	DLX1	UNKNOWN	SYBR	None				30.1719	30.77	0.523164							TRUE	0.264895	TRUE	3	24	1	88.1676				Y	N
F11	H1299-D1	DLX1	UNKNOWN	SYBR	None				31.143	30.77	0.523164							TRUE	0.264895	TRUE	3	25	1	88.1676				Y	N
F12	H1299-D1	DLX1	UNKNOWN	SYBR	None				30.9949	30.77	0.523164							TRUE	0.264895	TRUE	3	25	1	87.9827				Y	N
G1	H358	18s	UNKNOWN	SYBR	None				8.7015	8.6371	0.0753746							TRUE	0.418294	TRUE	1	2	1	82.4352				N	N
G2	H358	18s	UNKNOWN	SYBR	None				8.65561	8.6371	0.0753746							TRUE	0.418294	TRUE	1	2	1	82.6201				N	N
G3	H358	18s	UNKNOWN	SYBR	None				8.5542	8.6371	0.0753746							TRUE	0.418294	TRUE	1	2	1	82.805				N	N
G4	H358	AC025569.1	UNKNOWN	SYBR	None	12148	10850.7	13600.4	23.9146	23.84	0.0681904		15.2029	0.0586835			-13.5684	TRUE	0.314032	TRUE	3	18	1	79.4765				N	N
G5	H358	AC025569.1	UNKNOWN	SYBR	None	12148	10850.7	13600.4	23.8245	23.84	0.0681904		15.2029	0.0586835			-13.5684	TRUE	0.314032	TRUE	3	18	1	79.4765				N	N
G6	H358	AC025569.1	UNKNOWN	SYBR	None	12148	10850.7	13600.4	23.7809	23.84	0.0681904		15.2029	0.0586835			-13.5684	TRUE	0.314032	TRUE	3	18	1	79.4765				N	N
G7	H1299-D2	ACtin	UNKNOWN	SYBR	None				15.8903	15.922	0.03585							TRUE	0.334831	TRUE	3	9	1	87.0581				N	N
G8	H1299-D2	ACtin	UNKNOWN	SYBR	None				15.9148	15.922	0.03585							TRUE	0.334831	TRUE	3	10	1	87.243				N	N
G9	H1299-D2	ACtin	UNKNOWN	SYBR	None				15.9609	15.922	0.03585							TRUE	0.334831	TRUE	3	10	1	87.243				N	N
G10	H1299-D2	DLX1	UNKNOWN	SYBR	None				30.9976	30.959	0.0335071							TRUE	0.264895	TRUE	3	25	1	88.1676				N	N
G11	H1299-D2	DLX1	UNKNOWN	SYBR	None				30.9384	30.959	0.0335071							TRUE	0.264895	TRUE	3	25	1	88.1676				N	N
G12	H1299-D2	DLX1	UNKNOWN	SYBR	None				30.9409	30.959	0.0335071							TRUE	0.264895	TRUE	3	25	1	87.9827				N	N
H1	H1650	18s	UNKNOWN	SYBR	None				9.21248	9.28163	0.233327							TRUE	0.418294	TRUE	1	2	1	82.2503				N	N
H2	H1650	18s	UNKNOWN	SYBR	None				9.0907	9.28163	0.233327							TRUE	0.418294	TRUE	1	2	1	82.4352				N	N
H3	H1650	18s	UNKNOWN	SYBR	None				9.54172	9.28163	0.233327							TRUE	0.418294	TRUE	1	2	1	82.6201				N	N
H4	H1650	AC025569.1	UNKNOWN	SYBR	None	41.4068	22.4138	76.4941	32.2971	32.6812	0.500699		23.3995	0.318926			-5.3718	TRUE	0.314032	TRUE	3	26	1	79.1067				Y	N
H5	H1650	AC025569.1	UNKNOWN	SYBR	None	41.4068	22.4138	76.4941	32.4989	32.6812	0.500699		23.3995	0.318926			-5.3718	TRUE	0.314032	TRUE	3	26	1	79.2916				Y	N
H6	H1650	AC025569.1	UNKNOWN	SYBR	None	41.4068	22.4138	76.4941	33.2475	32.6812	0.500699		23.3995	0.318926			-5.3718	TRUE	0.314032	TRUE	3	27	1	79.2916				Y	N
H7	H1299-D6	ACtin	UNKNOWN	SYBR	None				15.5886	15.6453	0.0772931							TRUE	0.334831	TRUE	3	8	1	87.0581				N	N
H8	H1299-D6	ACtin	UNKNOWN	SYBR	None				15.614	15.6453	0.0772931							TRUE	0.334831	TRUE	3	7	1	87.0581				N	N
H9	H1299-D6	ACtin	UNKNOWN	SYBR	None				15.7333	15.6453	0.0772931							TRUE	0.334831	TRUE	3	10	1	87.0581				N	N
H10	H1299-D6	DLX1	UNKNOWN	SYBR	None				31.0705	30.9377	0.279705							TRUE	0.264895	TRUE	3	25	1	88.1676				N	N
H11	H1299-D6	DLX1	UNKNOWN	SYBR	None				31.1262	30.9377	0.279705							TRUE	0.264895	TRUE	3	25	1	87.9827				N	N
H12	H1299-D6	DLX1	UNKNOWN	SYBR	None				30.6163	30.9377	0.279705							TRUE	0.264895	TRUE	3	26	1	87.7978				N	N
Analysis Type	Singleplex
Endogenous Control	18s
RQ Min/Max Confidence Level	95.0
Reference Sample	beas-2b-0916

## Sheet: Raw Data
Block Type	96alum
Chemistry	SYBR_GREEN
Experiment File Name	D:\DATA\WANGJUAN\20220917zdh.eds
Experiment Run End Time	2022-09-17 13:44:56 PM CST
Instrument Type	sds7500
Passive Reference	ROX
Well	Cycle	1	2	3	4	5
A1	1	84183.8	19231.2	44406.4	203444	1862.35
A2	1	83236.1	18346.1	46567.9	196970	2622.38
A3	1	91748.4	19544.9	51858.8	202533	2471.62
A4	1	73815	17426.7	54469.9	207023	1972.94
A5	1	73516.7	18467.3	60791	225274	1875.99
A6	1	71289.3	16737.1	58131.5	213678	2025.65
A7	1	74823.9	17030.3	54476.6	202945	1794.75
A8	1	88703.8	19072.5	56737.3	213110	2250
A9	1	90795.5	19098	53801.3	206769	2448.92
A10	1	189003	30934.3	51592.4	206179	2490
A11	1	177437	30542.4	47762.9	207258	2088.79
A12	1	179603	32715.5	45311.4	203052	3049.25
B1	1	72276.5	16926.8	47182	208895	2171.28
B2	1	65471.9	15720	48462	202644	1840.17
B3	1	75992.3	19200.4	60551.9	218660	1501.09
B4	1	64741.2	15854.8	58272.2	215258	1991.94
B5	1	60626.2	16072.1	60142.9	214360	2392.28
B6	1	69909.8	17709.2	54547.7	184365	10855
B7	1	78949	19505.1	61898.1	220096	2797.46
B8	1	78559.8	19276.7	63086.2	229694	1634.71
B9	1	76126.8	18220.1	59339.5	222244	2380.64
B10	1	191227	31696	59149.4	233981	1867.14
B11	1	183955	31058.7	52114.4	216765	1801.55
B12	1	180977	33411.8	52370.6	232967	3926.85
C1	1	70849	17338.6	50338.5	213285	2323.08
C2	1	74034.6	17736.6	55298.4	220260	2680.06
C3	1	72850.5	17317.5	54847.9	206324	2242.95
C4	1	71908.3	17421.7	61741.7	217167	2637.44
C5	1	61034.7	15434.7	59792.4	202855	2058.98
C6	1	64323.2	16385.6	62321.4	209668	2436.75
C7	1	84227.7	20397.4	68209.7	230790	2868.95
C8	1	79184.9	19178.1	64754.8	225540	2401.83
C9	1	89427.1	20478.5	64908.7	231595	2349.69
C10	1	194275	31971.7	61408.3	233996	2779.8
C11	1	197247	33355.2	59618.6	240151	1580.62
C12	1	216852	38515.2	58644.2	244427	2775.44
D1	1	89247.6	20165.6	55023.4	232867	2477.24
D2	1	80107.6	18862.5	57463.3	228196	0
D3	1	83252.6	19819.6	62575.6	231709	3597.69
D4	1	143052	35332	76646.2	247317	5895.58
D5	1	89717.5	21709	73096.2	247539	2177.23
D6	1	90550.5	22439.5	76487.2	247550	2369.79
D7	1	102072	23857.6	78816.8	258512	3760.94
D8	1	84627.6	22312.9	77030.9	262214	2270.41
D9	1	95276.8	24204.3	76318.3	260888	3570.55
D10	1	220154	36336.9	70896.8	262579	1721.07
D11	1	207731	35575.9	66804.8	266711	1386.12
D12	1	211252	37930.6	62008.5	263973	2495.85
E1	1	79677.2	18368.3	52131.2	220796	1677.2
E2	1	76249.1	19858.6	59387.9	235486	1716.27
E3	1	91612.3	21485.6	65936.9	244408	2382.74
E4	1	90740	22492	75019.4	259678	5072.85
E5	1	70662	20143.8	81316.1	285006	2333.44
E6	1	94449.5	23653	88395.5	296282	2948.95
E7	1	97651.1	22391.6	79978.4	269709	2508.04
E8	1	93434.8	22842.1	81041.1	281042	2764.01
E9	1	121987	26182.4	79413.2	277446	2778.24
E10	1	210847	35275.2	71970.1	271271	1517.67
E11	1	225583	38503.5	70930	285097	1669.77
E12	1	215539	37878.2	60786.1	258817	1582.72
F1	1	73325.2	18762.4	54132	231556	2739.8
F2	1	73787.3	19041.5	62203.7	249549	2615.51
F3	1	76209.9	20538	70348.4	265324	3451.83
F4	1	66707.3	18426.8	74336.3	270638	2101.3
F5	1	65657.9	18329.5	77538.1	274030	1631.28
F6	1	78656.5	21608.6	84028.9	288609	2513.5
F7	1	103265	24963.4	84694.3	289510	2683.14
F8	1	89463.9	22497.2	78281.3	275212	2170.12
F9	1	106832	24388.5	77325.8	276295	2213.11
F10	1	225468	37252.6	73804.5	281591	1772.6
F11	1	231754	39509.4	69346.9	276917	1791.29
F12	1	230267	40504.3	64381.9	273926	2997.97
G1	1	101283	24211.4	57190	238940	5255.74
G2	1	89668.1	20953.7	58397.6	242609	1614.24
G3	1	87934.6	21247.4	64047.4	250629	1689.54
G4	1	81790.9	20893.2	75166.9	276852	2093.59
G5	1	85734.6	21191.4	75949.6	275099	3637.49
G6	1	83881	20099.1	73772.1	262886	2076.52
G7	1	88580.8	21802	74928	265491	2170.5
G8	1	92965.4	22620.5	73923.9	264482	2212.07
G9	1	87587.9	21305.5	70202.7	261661	1687.35
G10	1	240702	39641.1	69832	266708	2422.13
G11	1	216186	38023.8	64242.8	264644	1688.59
G12	1	250360	44722.4	64682	257967	4115.45
H1	1	85342.1	21848.3	50121.9	224068	4463.86
H2	1	81469.4	20468.7	54142.8	233439	2232.77
H3	1	123094	36919.4	78230.6	270659	47497.6
H4	1	75728.9	21383.9	69040.8	263718	2156.23
H5	1	70913	19184	66664.9	248860	2655.38
H6	1	88276.1	22050.1	71314.3	255962	3480.85
H7	1	81687.2	20099	63210.3	232833	2709.11
H8	1	80939.1	20347.6	63882.7	236402	1831.2
H9	1	178580	34147.5	74944.7	252993	7974.35
H10	1	205927	36485.9	63068.6	256707	1724.99
H11	1	201805	37475	59110.6	253380	1853.78
H12	1	185307	35133.8	50556.5	223691	2673.63
A1	2	86752	19380.1	43712.7	200923	2377.17
A2	2	84737.7	18702.3	45318.7	190940	2617.93
A3	2	94853.5	20210.1	51045.3	200286	2444.5
A4	2	79235.4	18130.2	53591	204714	2332.48
A5	2	75887.4	18905	61329.7	225695	1880.75
A6	2	75034.5	17291.2	58225.2	212755	1880.33
A7	2	76815.8	17442.4	55016	204241	1538.95
A8	2	90859.6	19203.4	57776.3	215747	2275.01
A9	2	92663.1	19392.6	54616.9	208843	2473.86
A10	2	191244	31328.7	52248.7	207088	2156.26
A11	2	181994	31312	49093.8	210860	2224.44
A12	2	185944	33851.8	46460.3	207357	3257.37
B1	2	72639.9	16755.8	46076.4	203945	1261.83
B2	2	64658.6	15428.8	47057.2	195877	1702.56
B3	2	75515.5	19158.6	58802	214165	1423.56
B4	2	65373.3	16035.8	58219.9	214246	2040.43
B5	2	61875.3	16261.4	59975	212905	2065.32
B6	2	71552.7	17535.1	54395.1	182995	10223.9
B7	2	79723.6	19525.5	62049.5	219387	2489.22
B8	2	79043	19459.9	63361.8	230653	1658.05
B9	2	76966	18571	59337.4	221252	1955.45
B10	2	190146	32023.2	59398.5	233788	1953.96
B11	2	184166	31037.1	52678.5	218174	1764.15
B12	2	182157	33758	52607.3	232806	3684.78
C1	2	73687.1	17587.7	49998.1	211627	2679.37
C2	2	73506.4	17189	53609.1	213055	3338.1
C3	2	73269.9	17045.3	54506.5	204334	2339.86
C4	2	73844.4	17485.5	61638.9	216177	3042.14
C5	2	63326.2	15631.8	59761.6	203491	2070.42
C6	2	68227.4	16431.2	62389	209906	2142.57
C7	2	84778.2	20118.7	67917.5	230054	2656.51
C8	2	79557.4	19210.1	64079.9	223427	3043.66
C9	2	87460.5	20361.9	64522.3	230034	2272.37
C10	2	191525	31875.6	61069.5	232452	2473.69
C11	2	197836	33333.5	59230.4	238934	1457.87
C12	2	215757	37965.7	58476.5	243664	2737.07
D1	2	92453	20530.5	55009.2	231180	2494.57
D2	2	82988.8	18791.7	56258.5	223446	0
D3	2	86646.8	20006.7	61932.2	228287	3675.08
D4	2	144738	35656.7	76163.7	246397	5750
D5	2	93869.6	21999.7	73655.2	248660	2487.97
D6	2	93818.9	22706.8	76444.3	246991	2264.84
D7	2	101987	23672.9	78681	258020	3476.31
D8	2	84555.1	22258.9	76298.2	259125	2346.02
D9	2	94737.1	23925.9	75356.7	257825	3476.48
D10	2	215439	35496.5	70504.9	261098	2118
D11	2	205543	35870.7	67061.6	268061	1484.12
D12	2	210418	37675.4	62088.6	262695	2343.07
E1	2	83754.1	19023.4	53239.7	224713	1709.62
E2	2	76119	19138.7	57424.5	228425	1466.65
E3	2	94210	21367.1	64893.9	239778	1947.25
E4	2	90145.7	22345.1	74390.1	256653	5185.92
E5	2	72905.2	20539.3	81645.5	285767	2460.43
E6	2	95635.8	23951.3	88856.2	296359	3167.2
E7	2	99381	22470.9	78949.3	266998	3155.45
E8	2	95097.7	23104.9	80873.8	279593	3098
E9	2	121769	26213.2	79389.3	277069	2438.99
E10	2	209770	35228.4	72754.2	273169	1551.94
E11	2	229816	39289.8	73253	291974	1675.85
E12	2	222336	38462.3	62840.7	264772	1595.05
F1	2	74811	18421.5	53080.6	225399	2907.54
F2	2	71282.6	18578.5	59087.6	236114	2031.61
F3	2	74749.1	20107.8	68311.5	256700	3137.21
F4	2	65494.5	18069	72188.2	263070	1915.8
F5	2	65717.2	18199.7	75847.1	267142	1309.6
F6	2	78242.8	21692.2	84048.6	287146	2253.18
F7	2	104217	24881.6	83759.6	285995	2712.63
F8	2	91306.5	22757.8	78211.6	274305	2652.27
F9	2	107840	24429.2	77081.6	274462	2068.74
F10	2	222890	36954.9	74755.8	284502	1635.96
F11	2	238196	40990.8	71310.1	284680	1840.45
F12	2	240449	42529.3	67553	284976	2671.43
G1	2	102344	24563.5	55872.5	234719	4836.38
G2	2	89493.3	20612.6	56921.5	236073	1913.8
G3	2	88325.5	20813.9	62642.6	246402	1956.18
G4	2	81857.5	20820	73462.2	270453	2152.89
G5	2	86416.1	21033.1	74565.3	268846	3712.74
G6	2	84456.6	19824.7	72365.5	257035	2110.31
G7	2	89048.8	21445	73993	262648	2408.17
G8	2	91989.2	22047.8	72006.1	258151	2174.39
G9	2	89586	21337	70565.5	261890	1364.88
G10	2	242787	39954.4	70619.3	268418	2376.9
G11	2	223252	39007.1	66488.7	270779	1720.82
G12	2	265535	47313.8	68320	267763	4164.37
H1	2	87473.8	21374.5	48570	216432	3593.58
H2	2	78698.1	19906.6	52184.9	221561	1738.56
H3	2	128346	37899.2	78362.5	267500	52329.3
H4	2	76899.1	21362.1	68243.4	260968	1992.9
H5	2	72137.7	19140.8	66421.9	246251	2920.85
H6	2	91607.6	22457.4	71429.3	255590	3981.84
H7	2	83673.9	20643.8	64013.5	235372	2520.59
H8	2	83136.2	20827.2	63900.5	235866	2015.47
H9	2	171978	33323.4	74590.5	255172	7274.48
H10	2	210846	37302.9	64503.8	260349	1726.87
H11	2	207583	38118.3	61273.6	261548	1819.43
H12	2	194351	37808.5	52641.8	231384	2799.86
A1	3	90125.9	19635.2	43605.9	198103	1994.57
A2	3	88952.7	18853.9	45057.2	188365	2671.31
A3	3	98715.6	20303.7	50271.7	196250	2705.33
A4	3	81734.1	18142.6	53588	202413	2410.16
A5	3	79314.1	19214.9	60042.8	221907	1739.67
A6	3	76264.3	17564.3	57320.5	210319	2048.9
A7	3	77045.7	17462.1	54419.2	201508	1779.21
A8	3	91098.5	19175.9	57320.4	214056	2718.97
A9	3	92848.1	19388	54065.5	206444	2394.5
A10	3	187769	31022.1	51426.9	205244	2803.49
A11	3	179050	30795.1	48245.3	208018	2077.71
A12	3	184111	33303.2	46139.1	205071	3741.38
B1	3	74017.1	17072	45908.6	201196	1694.62
B2	3	66347.2	15615.8	46212.9	191044	1665.25
B3	3	77400.8	19200.4	58583.3	210528	1835.98
B4	3	65485.7	15997.9	57401.1	211371	1656.69
B5	3	62202.3	16133.5	59230.3	209846	2315.11
B6	3	71308.4	17573.1	53683.4	181210	10326.7
B7	3	80470.4	19386.9	61323.2	217890	2270.21
B8	3	79096.5	19164.4	62920.5	228453	1758.82
B9	3	78524.5	18695.6	59264.8	219911	2060.45
B10	3	188323	31634.6	58939	232899	1958.47
B11	3	183719	31114.8	52253.9	216171	2184.31
B12	3	181294	33395	52141.9	232019	3301.03
C1	3	75278.6	17610.2	49293.2	208228	2522.87
C2	3	75246.5	17886	52853.4	210646	3176.15
C3	3	74942.9	16880.4	53585.8	200554	2162.2
C4	3	74654.8	17707.7	61523.2	215033	3262.02
C5	3	64789.4	15616.2	59267.2	202441	2072.5
C6	3	68180.8	16755.7	63188.3	211419	2158.79
C7	3	85002	20146.1	67570	227542	2667.13
C8	3	78944.4	18954.4	63652.5	220670	2368.28
C9	3	87584.4	20457.5	63598.3	227147	2410.91
C10	3	188703	30964.4	60374.9	230571	2760.92
C11	3	197379	33041.7	58801.3	237150	1613.21
C12	3	213964	37710	58125.9	241822	2775.44
D1	3	95036.7	21021.3	54038.1	228143	2386.51
D2	3	85628.1	19193.7	55622.8	221044	0
D3	3	89932.9	20257.7	61728.8	227629	3311.54
D4	3	147254	35517.2	76825.3	247208	5990.16
D5	3	95477.3	22298	74025.6	249851	2263.55
D6	3	96052.1	22901.5	76160.9	245943	2181.93
D7	3	102052	23450.4	78358.1	257396	3512.93
D8	3	85080.7	22261.9	75525.2	257246	2498.32
D9	3	95298.6	23686.4	74722.5	256022	3530.54
D10	3	209148	34722.8	69465.4	258018	1876.79
D11	3	200636	35002.4	66340.5	265113	1061.64
D12	3	210061	37497.3	61836.9	261153	2573.29
E1	3	86336.8	19373.4	52925.8	222631	1215.75
E2	3	78183.4	18868.2	56952.6	226513	1837.33
E3	3	96312.4	21715.9	64553.7	237773	1969.31
E4	3	91328.1	22530.8	73603.2	253489	5069.02
E5	3	74981.5	21149.4	81970.6	286817	2220.56
E6	3	96491.6	23925.4	88719.2	295894	2889.51
E7	3	100674	22610.2	79125.6	266448	2883.26
E8	3	95358.4	23021.7	80119.8	276489	2859.7
E9	3	122014	26010	78569.7	273940	2373.67
E10	3	205888	34533.2	71891.4	270493	1370.79
E11	3	228200	38790	72907.9	289482	1885.03
E12	3	221261	38651.8	62138.3	262400	1588.2
F1	3	76410.3	18654.4	52347	223879	2772.84
F2	3	72453.4	18440.2	58589.2	235166	2320.94
F3	3	76744.7	20098.7	67552.8	253241	3189.95
F4	3	66689.8	18120.8	71609.6	259417	1837.15
F5	3	66652.8	18203.6	75534.2	265879	1743.13
F6	3	78849.3	21426.6	83223.7	285529	2161.12
F7	3	104666	24836.2	82959.9	283313	2683.14
F8	3	93004.5	22792	78063.8	273756	2406.52
F9	3	107961	23950.2	76353.6	270348	2405.91
F10	3	219485	36744.1	74257.3	281593	2234.36
F11	3	236770	40667.7	70833.5	282641	1817.67
F12	3	239410	42282.9	66845.8	281564	2647.79
G1	3	107055	24971.2	55773.8	232181	4772.54
G2	3	93190	20967.2	56420.8	233676	1896.87
G3	3	91950.1	21266.2	62274.9	244351	1587.72
G4	3	84476.9	20972	72362.7	265715	2173.18
G5	3	89154.5	21060.2	73687.4	265280	3577.59
G6	3	85907	19919.2	71606.8	254158	1850.74
G7	3	89153.9	21642.5	73328.2	260091	1957.48
G8	3	92030	22088.9	71160.5	256064	2014.61
G9	3	90622.5	21719	69979.6	259715	1352.11
G10	3	242357	39852.4	70171.4	266952	2345.51
G11	3	222857	38727.5	66236.6	268999	1467.59
G12	3	267280	47956.3	69227.5	265935	4578.16
H1	3	91033	21727.8	48506	214490	3990.75
H2	3	82179.4	19880.1	51413	219211	1867.03
H3	3	131335	38062.9	77136.3	263543	53146.3
H4	3	78580.1	21240.4	67846.7	257980	1897.05
H5	3	73079.4	19107.5	65755.8	243899	2897.15
H6	3	93324.7	22752.9	71145.9	253520	4137.34
H7	3	85213.4	20509.5	63801.4	234258	2636.5
H8	3	84888.3	20826.5	63883.4	234880	1985.66
H9	3	169053	32690.5	74001	252418	6926.84
H10	3	210371	36740.8	64236	258638	1877
H11	3	208839	38408.9	61116	259945	1564.58
H12	3	196091	37204	52651.4	230625	2994.18
A1	4	93545.1	20557.3	43179.9	197157	2101.48
A2	4	91359.7	19100.5	44499.3	185951	2099.68
A3	4	102273	21029.9	50863.2	198718	2357.9
A4	4	81895.1	18242.6	53714.8	202849	2763.71
A5	4	82223.2	19205.2	59326.7	218945	1681.53
A6	4	79362.3	17394.4	57053.7	208660	2321.11
A7	4	78641.2	17227	54146	200035	1727.43
A8	4	91838.7	19057.7	56895	211624	2515.75
A9	4	95063.8	19767.5	53736.9	205214	2044.17
A10	4	186267	30654.1	51006.4	202858	2259.96
A11	4	179846	30863.3	48547.3	206331	2077.71
A12	4	183702	32850.1	46097.8	202992	3179.93
B1	4	77540	17304.4	46063.2	203367	2232.69
B2	4	68715.9	15643.5	46455.8	192142	1444.85
B3	4	81288.9	20199.4	58620	210550	1841.36
B4	4	67187.5	16133.6	57219.3	212510	2442.73
B5	4	63340.6	16289	59699.3	210588	2261.3
B6	4	71954	17229.8	53903.1	181524	10175.8
B7	4	80293	19232	60772.9	215285	2296.57
B8	4	79699.1	18960	62281.8	225463	1907.34
B9	4	79444	18589.7	58691.4	218330	1928.42
B10	4	187236	31344.8	58845.3	231256	2159.16
B11	4	181809	30876.4	52017.7	214308	2064.62
B12	4	181497	33383.8	51632.5	229606	3774.18
C1	4	78379.3	17861.7	49250.2	209209	2595.02
C2	4	77962.1	17860.9	52389.5	208548	3291.34
C3	4	77007.8	16960.8	53210.5	199260	2295.44
C4	4	75757.7	17481.2	61350.1	214914	3044.27
C5	4	64594.7	15936.8	59583.4	203200	2087.06
C6	4	68511.1	16869.1	63406.4	212508	2172.85
C7	4	84936.4	19599.2	66557.8	224443	2975.17
C8	4	80256.5	19015	62962.7	218749	2178.2
C9	4	87903.4	20269.5	62704.8	222907	2544.07
C10	4	182934	30692.7	59197.4	225493	2570.1
C11	4	196811	32831.6	58685.9	234731	1393.77
C12	4	212974	37281.5	57573	239582	2835.6
D1	4	99086.1	21279.9	53887.2	227309	2222.38
D2	4	89785.5	19708.9	55411.3	219058	0
D3	4	94018.4	20932.5	61739.1	226740	3185.27
D4	4	148371	36106.6	76507.9	246558	6043.29
D5	4	96109.5	22521.2	74324.5	250946	2660.61
D6	4	96902.1	23075.8	75964.3	245958	2577.6
D7	4	103170	23689.3	78231.9	255567	3405.15
D8	4	86278.1	21879.1	74783.8	254925	2630.09
D9	4	95327.4	23428	74627.8	254638	3218.04
D10	4	200774	33337.9	68344	255408	1523.62
D11	4	198740	34637.6	66314.3	261829	1196.66
D12	4	209809	37504.9	61314.8	259025	2011.33
E1	4	88776.9	19606.7	52375.3	220952	1749.6
E2	4	81324.1	19608.4	56827	224035	1401.3
E3	4	103998	22753	64764	238066	2330.94
E4	4	91792.5	22493.8	72935.6	251194	4870.67
E5	4	76499.1	21150.2	82198.6	287243	2068.88
E6	4	98125.6	24257	88705.3	295887	3060.74
E7	4	103337	22668.6	79344.6	266001	2836.04
E8	4	97079.8	23047.8	79681.5	276145	3052.87
E9	4	122097	25662.3	77748.1	270647	2387.37
E10	4	204535	34418.7	71734	268573	1649.85
E11	4	227183	38662.4	72630	287458	1450.87
E12	4	220440	38408.5	61712	259835	1663.57
F1	4	79134.5	18711.9	52241.5	222864	2667.37
F2	4	75598.4	18417.9	57621.5	231998	2355.53
F3	4	80333.3	20202.2	67270.3	253279	3308.82
F4	4	67127.2	18207	71090.2	258522	1914.94
F5	4	67972.4	18380.8	74845.6	264047	1663.12
F6	4	79411.4	21484.8	82750.5	283230	2299.21
F7	4	105612	24744.7	82552.1	282780	2386.7
F8	4	94702.6	23021.7	77657.3	271849	2264.51
F9	4	109478	24222.7	76002.1	269499	2413.98
F10	4	218582	36441	73493.3	279078	2051.54
F11	4	237031	40173.1	70578.6	278813	1854.84
F12	4	238808	42331.9	66621.9	279391	3079.24
G1	4	112913	25521.7	55750.3	231667	4775.44
G2	4	99227.8	21680.8	56033.5	232255	1321.03
G3	4	97884.1	21780.4	62132.4	242830	1762.03
G4	4	86422.1	20853.8	71414.8	263045	2078.76
G5	4	92071.9	21178.5	73230.6	263467	3592.95
G6	4	89151.1	20343.7	71078.4	252169	2076.52
G7	4	89980.8	21698.3	73096.7	258744	2188.43
G8	4	92298.7	22064	71022.2	254667	2183.43
G9	4	91781.9	21305.5	69755.6	258188	1578
G10	4	242177	39303.8	70037.8	265300	2446.12
G11	4	221855	38699.1	65962	267466	1635.64
G12	4	267866	47733.5	68919.5	265138	4943.01
H1	4	93650.9	22191.8	48437.5	214831	3958.63
H2	4	84443.1	20363.9	50578.1	215884	1945.78
H3	4	134584	38206.5	76977.4	262614	53994
H4	4	79036.8	21375.8	67365.1	256146	2081.08
H5	4	74148.2	19242.8	65353.6	240958	2938.46
H6	4	94719.9	22832.8	70788.2	251391	3978.32
H7	4	85799.3	20520.3	63577.7	232402	2917.6
H8	4	86213	20857.1	63497.3	233652	2150.96
H9	4	167080	32134.8	73023.6	250100	6870.3
H10	4	210946	36603.2	63993.7	256164	1766.53
H11	4	209237	38392.7	61021.2	258164	1525.8
H12	4	194263	36869.5	52917.5	229067	3120.41
A1	5	96128.4	20405.2	42938.5	195323	2108.51
A2	5	96273.1	19722.6	44395.4	184348	2477.8
A3	5	106575	21449.1	51174.2	198852	2657.34
A4	5	82252.2	18088.9	54066.8	204797	2518.71
A5	5	83721.8	19304.6	59238	216295	2064.73
A6	5	79665.1	17567.3	57665.8	209909	1941.36
A7	5	79637.1	17377.2	54030.1	198526	2216.25
A8	5	92814.2	19288.9	56682.4	210216	2433.42
A9	5	95581.5	19765.2	53415.9	203528	2596.31
A10	5	184582	30230.8	50767.2	201277	2072.82
A11	5	178597	30529.6	47854.4	204239	1888.08
A12	5	182334	32456.6	45909.6	201272	3371.92
B1	5	81889.5	17785.2	46170.6	202688	1791.12
B2	5	72340.4	16455.4	46781.6	194269	1657.08
B3	5	83811	20050.2	58974.3	212224	1620.61
B4	5	67495.6	16115.7	57768.9	212846	1793.88
B5	5	62607.9	16189.8	59752.2	211647	1872.4
B6	5	72459.8	17480.7	54205.5	182948	10172
B7	5	80949	19017.9	60017.9	212494	2579.46
B8	5	79686.8	19243.9	61482.7	223128	1563.63
B9	5	80013.7	18490	58556.5	217583	2134.26
B10	5	184089	30881.2	58132.4	229403	2167.06
B11	5	181974	30538.6	51691	211904	1665.66
B12	5	181723	33421.6	51395.8	227539	4023.13
C1	5	81608	18632.7	49457.3	209281	2926.89
C2	5	82100.6	17978.1	52598.7	208693	3084.92
C3	5	80674.9	17320.6	53554	199922	2324.72
C4	5	76160.3	17827.8	61634.6	215796	3291.76
C5	5	64674.4	15539.5	59956.9	202947	2268
C6	5	69073.5	16765.2	63637.6	212581	1996.56
C7	5	85575.5	19862.1	65757.3	222142	2570.48
C8	5	80376.2	18759.3	62591.5	217753	2367.17
C9	5	88473.4	19997.4	62683	221840	1973.83
C10	5	180461	29829.6	58892.4	223758	2650.6
C11	5	195587	32424.4	58359.2	233725	1658.84
C12	5	210882	36909.1	57468.3	237143	2837.67
D1	5	103754	21894.6	54257.8	227998	2160.19
D2	5	94607.5	20193.6	55496.1	219107	0
D3	5	97949	21231.3	61503.6	226138	3096.68
D4	5	144995	34554.3	76590.5	246705	6075.17
D5	5	95935	22533.6	74679.5	251921	2652.49
D6	5	96062.3	23099	76364.9	246042	2020.31
D7	5	104491	23647.7	77515.5	253408	3689.78
D8	5	87410.8	22099	74848	253120	2665.74
D9	5	96000	23518.8	74348.3	254964	3946.85
D10	5	198114	32481.1	67574.6	252058	1457.46
D11	5	196750	33993.1	65314.5	259705	1466.69
D12	5	208891	37002.1	61071.4	257163	2627.71
E1	5	93224.6	19953.2	52081	219087	1470.79
E2	5	83669.1	19617.5	56585.5	224605	1203.1
E3	5	105492	22415.5	64316.2	237613	2309.84
E4	5	93386.4	22535.4	72803.9	250217	5233.84
E5	5	76891.5	21060.1	82570.5	287898	1984.22
E6	5	99111.6	24259.4	88024.5	294278	3016.38
E7	5	104629	22881.8	78971.4	265056	2829.17
E8	5	98412.5	23060.9	79864.9	275108	2805.54
E9	5	123568	25861.6	77449.9	269994	2501.15
E10	5	203269	33953.4	71478.7	266920	1173.99
E11	5	226242	38342.3	71961.5	285573	1579.78
E12	5	218990	38185.1	61401.5	257696	1392.25
F1	5	83059.3	19487.6	52072.1	221634	3095.62
F2	5	78395	18863	57657.1	230514	2469.79
F3	5	82067.3	20661.5	67492.9	252459	3393.73
F4	5	68519.4	18278.9	71294.2	258689	1949.14
F5	5	69002.5	18407.2	74846.4	262285	1515.34
F6	5	80117	21367.7	82521	281492	2142.07
F7	5	106554	24951.5	82236.6	280833	2742.91
F8	5	95383.9	22805.5	77037.5	270181	2437.98
F9	5	111185	24513.8	75672	267947	2507.23
F10	5	216327	36380.1	73965.7	279569	1840.45
F11	5	234565	40041.3	69771.6	276266	1804.48
F12	5	239657	41909.6	66448	276685	3021.61
G1	5	120524	26876.3	55221.8	230165	5081.61
G2	5	107080	22398.9	55447.6	229830	1224.71
G3	5	105483	22526.6	61566.8	240595	1881.1
G4	5	89329.1	20906.6	70140.8	258415	1961.72
G5	5	93622	21371.4	72654.6	260922	3460.11
G6	5	92611.3	20451.6	70704	250113	2029.68
G7	5	91941.7	21795.6	72247.1	256698	2091.27
G8	5	93755.7	21989.1	70621.7	253189	2298.75
G9	5	92645.8	21351.1	69215.5	256373	1496.58
G10	5	240739	38830.6	69490.7	263303	2385.2
G11	5	221435	38376.2	65181	265174	1265
G12	5	267951	47862	68834.7	263401	4392.23
H1	5	97722.2	22883.6	48654.9	214707	3768.8
H2	5	89290.5	20656.5	50364.6	213478	2257.64
H3	5	138318	38249.2	76366.9	260859	53883.7
H4	5	80290.3	21313.7	66743.6	252889	2035.84
H5	5	74826.1	19053.7	64937.5	239273	2704.14
H6	5	96326	22745.6	70405.8	249674	4385.72
H7	5	86851.5	20741.5	63207.6	231061	2720.43
H8	5	87397.9	20864.8	63226.8	232313	2131.99
H9	5	165507	31956.1	72293.9	247948	6375.2
H10	5	209038	36348.3	63481.6	254790	1791.08
H11	5	208658	37905	60422.5	256150	2118.61
H12	5	194208	36797.5	52519.7	226902	2528.95
A1	6	101512	21132.5	43318.7	195987	2325.13
A2	6	100250	20723.7	44106.6	183725	2421.09
A3	6	111251	21822.5	51308.3	198618	2421.55
A4	6	83860.5	18618.1	54230	205213	2651.17
A5	6	84716.1	19475.2	59442.8	217848	1854.06
A6	6	80778	18010.3	57608.4	211295	1967.52
A7	6	80457.4	17122.4	53701.4	197599	1698.43
A8	6	92435.3	18995.4	56344.5	209076	2381.31
A9	6	95500.5	19510.7	52945.3	202039	2232.37
A10	6	183967	30074.5	50503.1	199267	2509.08
A11	6	176690	30660.2	47488.4	203400	2216.14
A12	6	179859	32456.6	45588.3	199400	3305.77
B1	6	85754	18378.9	45969	203887	1978.28
B2	6	76904.7	16695.1	46813.1	194011	1669.91
B3	6	89201	20662.7	59182.1	212792	1768.14
B4	6	67957.9	16133.6	58178.8	213645	2146.68
B5	6	63539.6	16265.5	59926.2	212026	2049.08
B6	6	73138.8	17685.9	54068.4	182289	9786.8
B7	6	81530.2	18976.1	59757.1	210836	2543.98
B8	6	80293.9	18965.3	61327.5	221906	1856.42
B9	6	79732.1	18429.8	58805.9	218350	2087.48
B10	6	183021	30734.6	58116.9	228131	1897.58
B11	6	178939	30353.8	50942.2	209662	1362.7
B12	6	181886	32832.9	51175.2	226220	4206.06
C1	6	87815.6	19020	49472.7	210023	2431.86
C2	6	87991.9	18872.5	52669.7	208383	2556.89
C3	6	86582.6	18197.7	53720.1	200041	2233.87
C4	6	76620	17791.6	61790.4	216196	2849.88
C5	6	65142.5	15875.6	60112.9	202733	1873.88
C6	6	69614.1	16669.8	63661.6	212998	2627.11
C7	6	86426.8	19689.7	65175.2	219885	2537.55
C8	6	81464.6	19067.9	63079.6	218336	2443.2
C9	6	88625.4	20102.5	62874.6	223395	2293.85
C10	6	179507	29419.6	58315	221902	2871.23
C11	6	193981	31951.8	58064.8	230799	1413.33
C12	6	208872	36327.8	56283.1	235172	2883.3
D1	6	111313	22533.3	54253.8	228498	2031.74
D2	6	100650	21109.7	55575.6	219937	0
D3	6	105691	21817.8	61603.2	227291	3834.96
D4	6	145985	35351.3	76369.6	247474	5982.72
D5	6	96618	22349.3	74701.9	252319	2331.59
D6	6	98158.5	23251	76446.4	246194	2418.07
D7	6	104714	23350.8	76755.9	250212	3127.84
D8	6	87824.6	22050	74168.6	250330	3027.58
D9	6	96359.1	23666.5	74536.5	255080	3020.15
D10	6	195594	32846.7	67390.4	249575	1572.47
D11	6	197368	34016.8	65488.3	260200	1504.8
D12	6	207962	36934.7	60965.3	254729	2282.37
E1	6	98780.1	20491.7	52772.1	220550	1378.93
E2	6	88694.2	19684.3	56842.4	224545	1646.63
E3	6	111610	23210.9	64704.9	237665	2190.89
E4	6	94137.8	22420.8	73204.9	250219	5388.11
E5	6	77281.7	21180.5	82274	288023	2023.02
E6	6	100185	24178.3	88117.9	292934	2854.03
E7	6	105547	23036.6	78904.1	264662	2921.9
E8	6	99695.4	22971.1	79610	273459	2755.89
E9	6	125722	26116.9	76975.2	267043	2364.19
E10	6	201169	33715.4	70698.4	265004	1151.47
E11	6	223255	38167.2	71410.4	283246	1831.52
E12	6	216455	37536	60885.4	254866	1645.75
F1	6	86273.9	19745.7	52297.5	221910	2910.09
F2	6	82812.9	19705.3	58068	230551	2268.52
F3	6	87759.1	21202.5	67313.9	252209	3341.89
F4	6	68580.5	18452.7	71407.3	258997	2213.29
F5	6	69861.9	18478.8	74882.2	261655	1780.69
F6	6	81358	21699.6	82295.5	280123	2144.45
F7	6	107654	24697.8	81900.6	279309	2507.03
F8	6	95657.9	22763.4	76775.4	268442	2488.15
F9	6	112500	24382.6	75261.5	265154	2568.21
F10	6	215367	35860	72732	274938	1754.69
F11	6	231818	39461.5	69119.1	273716	1844.05
F12	6	236502	41383.5	65562.5	274056	2786.68
G1	6	127128	27571.1	55093.7	228928	5249.94
G2	6	115914	23661.2	55208	228618	1542.26
G3	6	117964	23971.6	60739	236376	1518.69
G4	6	93253.2	21609.9	69650.5	256144	2080.33
G5	6	95554.6	21461.9	72176.9	259349	3725.8
G6	6	93407.9	20531.1	70185.6	248805	1813.88
G7	6	92841.4	21458.6	71737.3	253391	2109.21
G8	6	95079.3	22029.5	69800.3	250158	2375.62
G9	6	92426.5	21325.2	68701.8	253966	1274.69
G10	6	239276	38636.7	69311.8	261079	2311.36
G11	6	219190	37994.2	64617	262920	1518.23
G12	6	268135	47416.6	68812.8	260651	5226.79
H1	6	104598	23385.5	48525.4	213124	3593.58
H2	6	95156.6	21461.6	49952.5	211106	1860.82
H3	6	145520	39225.4	76059.5	258920	53629.1
H4	6	80729.3	21188.8	66595.2	251138	2065.75
H5	6	75612	18985.7	64489.9	237560	2828.07
H6	6	97190.4	22813.2	70075.5	247971	4053.61
H7	6	87844.5	20494.5	62917.5	229030	2790.37
H8	6	88082.6	20839.1	62713.4	230082	2114.38
H9	6	164500	31515.9	71636.2	245423	6482.93
H10	6	208590	36081.8	63049.7	252103	1684.39
H11	6	207612	37632.9	60030.1	254129	1913.62
H12	6	191655	36500.4	52415.4	224670	2879.29
A1	7	109073	22293.8	43454.6	196179	1967.85
A2	7	106199	21077.5	43890	182796	2641.29
A3	7	118022	22653.2	51127.2	198575	2523.79
A4	7	85359.5	18464.4	54274.2	205445	2509.75
A5	7	85282.1	19338.7	59473.9	218816	1637.68
A6	7	81635	17932.7	57765.2	211357	2080.86
A7	7	80906.9	17603	53601.6	198485	2031.91
A8	7	93502.6	19474.6	56088.1	208199	2506.37
A9	7	97515.9	19656.3	52938.7	201588	2298.13
A10	7	181831	29903.8	50165.3	198146	2163.41
A11	7	176189	29866.4	47630.9	201931	2056.95
A12	7	180156	32042.6	45357.3	198442	2852.42
B1	7	92645.3	19773	46002.8	203425	2026.53
B2	7	85582.6	18019.1	46954.4	193882	1715.39
B3	7	98380.8	21572.5	59187.5	212421	1397.71
B4	7	69126.5	16389.2	58161.3	214684	1735.08
B5	7	64813.4	16021	59945.5	211797	2067.35
B6	7	72523.6	17316.4	54329	182307	10102.8
B7	7	82218.2	19088.2	60076.2	211428	2474.01
B8	7	81309.3	18984.4	61597.8	221582	1432.09
B9	7	81498.5	18826.4	58926.5	218640	1865.01
B10	7	180536	30593.7	57983.6	226417	1894.2
B11	7	178438	29694.7	50865.1	208259	1612.05
B12	7	178861	32342.4	51165.9	224680	3954.36
C1	7	98743.2	20990.7	49796.6	210414	3015.68
C2	7	98221.3	20032.3	52753.4	209225	2876.21
C3	7	96456	19307.8	53643.2	200315	2282.32
C4	7	78069.3	17827.8	61872.6	216789	2894.49
C5	7	66012.2	15805	60089.5	203518	1966.43
C6	7	70046.9	16894.6	63831.7	213036	2231.26
C7	7	87061.7	19533	64954.7	219831	2550.29
C8	7	82620.2	19072.3	63037.2	219256	2784.24
C9	7	90128.7	20329.4	62693.9	223676	2296
C10	7	179295	29514.8	58558.5	222292	2799.68
C11	7	190794	31771.1	57099.8	228371	1737.06
C12	7	208083	36490.1	56281.1	233271	2702.84
D1	7	123832	24383.9	54246.7	228686	2260.1
D2	7	113448	22397.2	55507.9	220008	0
D3	7	119947	23525.2	61839.8	228060	3390.97
D4	7	148315	35521.3	77043	248228	5943.4
D5	7	98321.6	22846.2	75027.4	252839	2355.96
D6	7	98789	23247.2	76336.6	246202	2156.74
D7	7	105016	23409.8	76180.5	247551	3348.64
D8	7	88375.8	22296.9	73982.5	250066	2179.68
D9	7	98524.8	23673.5	74660.5	255406	3436.47
D10	7	197287	32429.8	67373	249137	1333.29
D11	7	196601	33742.4	65416.1	259796	1294.65
D12	7	205941	36626.3	60188.3	252570	2796.19
E1	7	106526	21672.4	52448.4	221466	1655.59
E2	7	96101.7	20708.5	56813.7	225300	1415.23
E3	7	124058	24856.5	64955	238504	2349.17
E4	7	95271.6	22907.7	73326.2	250560	5083.39
E5	7	78067.4	21191.1	82568.8	287982	2259.36
E6	7	101317	24341.3	88031.5	293968	2922.34
E7	7	107275	23156.4	79035.3	264400	2880.69
E8	7	100006	23154.7	79361.3	272895	3119.67
E9	7	125984	25597.7	76894.2	265945	2485.35
E10	7	200913	33541.3	70825.1	264170	1202.38
E11	7	221465	37650	71019.8	280657	1596.81
E12	7	215725	37220.6	60350.1	253066	1577.24
F1	7	96299.1	21304.1	52463	222638	3054.96
F2	7	91460	20644.6	57951.2	230873	2248.6
F3	7	98135.6	22406.2	67424.7	252486	3451.83
F4	7	69779	18327.3	71578.8	259368	2121.82
F5	7	70249.5	18764.8	74435.9	260942	1682.72
F6	7	81956.7	21499.7	82138.6	280210	2328.58
F7	7	107506	24838.4	81613.6	277872	2584.33
F8	7	97411.3	23057.5	76801.5	268060	2247.5
F9	7	114065	24550.2	74863.5	264311	2501.85
F10	7	212411	35119.3	71886.9	272124	1852.7
F11	7	229558	39103.4	69040.1	270934	1877.62
F12	7	234818	41235	65147.6	272156	2570.95
G1	7	143730	29436.6	54618.2	227871	4401.06
G2	7	131147	25214	55508	228182	1563.43
G3	7	134482	25678.9	60519.9	235579	1505.75
G4	7	94655.4	21642.1	69875.8	256328	1930.5
G5	7	96795.7	21458.1	71960.1	258521	3681.26
G6	7	94600.7	20779.5	70234.1	248393	2201.7
G7	7	93573.3	21510.1	71534.7	252797	2086.04
G8	7	95151.2	22008.9	69376.4	247471	2223.38
G9	7	93141.4	21243.4	67972.2	249780	1635.47
G10	7	237658	38193.7	68563.4	258394	2674.12
G11	7	217250	37371.2	64430.5	260678	1628.74
G12	7	267357	47233.8	68484.3	259127	4976.56
H1	7	114450	24987	48220	213081	3428.57
H2	7	106277	22817.4	49721.9	210798	1859.78
H3	7	156449	40507.9	76091.9	258761	53502.6
H4	7	81694.3	21274.2	65857.5	249676	2102.55
H5	7	76686.1	19255.6	63834.3	235563	2947.27
H6	7	97753.9	22888.7	69964.9	246318	4065.57
H7	7	88712.8	20494.5	62482.3	227103	2739.75
H8	7	88859	20879.4	62449.2	228062	2239.71
H9	7	164505	31065.6	70931.7	242921	6217.04
H10	7	206142	35556.6	62291.6	249583	1992.18
H11	7	206479	37769	59466.7	251781	2292.58
H12	7	192710	36369.9	52077.9	224746	2587.11
A1	8	122952	23957.4	43399.1	195818	2413.74
A2	8	118233	22283.2	43938.1	183638	2603.47
A3	8	131969	24124.1	51520.1	199044	2385.03
A4	8	87032.4	18451	54351.9	205580	2741.8
A5	8	85315.1	19319.2	60158.8	218950	1789.24
A6	8	82112.7	17805	57946.9	210933	1922.96
A7	8	82111.9	17697.2	53966.6	198773	2050.55
A8	8	95344.2	19356.4	55951.7	207017	2474.06
A9	8	98675.8	19725.1	53435.5	201783	2744.83
A10	8	179525	29515.4	49781	195597	2526.96
A11	8	176590	29921.8	47268.8	200464	1749.65
A12	8	179123	31824.6	44958.1	198390	3218.65
B1	8	109753	21347.7	46384.1	203880	1704.86
B2	8	100030	19813.8	47165.8	194626	1878.65
B3	8	113772	23241.6	59508.4	212888	1730.45
B4	8	68798.1	16317.7	57667.2	212300	1892.91
B5	8	64391.7	16535.6	60162.2	212486	1974.95
B6	8	73330.3	17602.2	54625.5	182933	9958.75
B7	8	82060.1	19027.1	60149.9	211655	2303.67
B8	8	82448.6	19058.5	61794.1	221710	1715.33
B9	8	82609.4	18873.1	58936.7	219234	1868.13
B10	8	179843	30234.7	57810.6	225209	2056.56
B11	8	176979	29240.9	50138.2	205889	1755.42
B12	8	178286	32182.6	50628.3	223204	3549.98
C1	8	115813	22798.5	49954.1	210508	2721.55
C2	8	115221	21938.2	53024.3	209366	2787.26
C3	8	113914	21044.6	53727.3	200385	2056.21
C4	8	77909.6	17780	61803.4	216235	2818.02
C5	8	65988.4	15983.4	60078.9	203937	2276.32
C6	8	70567.9	16915.8	63676.8	212982	2302.64
C7	8	87639.3	20096.7	65393.5	220149	2458.95
C8	8	83368.5	18886	63235.4	219116	2124.52
C9	8	90754.8	20455.4	62835.4	223499	2380.84
C10	8	179974	29544.2	58706.5	221930	3014.35
C11	8	187799	30914.3	56607.1	225276	1590.4
C12	8	207053	35987.2	55986.4	231883	2752.62
D1	8	144224	27033.2	54827	229312	2246.85
D2	8	135194	24534.3	56062	220784	0
D3	8	141189	25819.1	62100.3	228296	3177.13
D4	8	149112	35635.3	76886.4	248312	5854.14
D5	8	99872.1	23053.3	75373.2	253200	2421.97
D6	8	100625	23259.8	76642	246548	2266.94
D7	8	106275	23493.9	76029	247502	3225.16
D8	8	88988.7	22218.9	74346.1	250725	2379.5
D9	8	98848.2	23762.3	74736.6	254766	3300.22
D10	8	199440	32690	67809.9	250882	1711.91
D11	8	197566	34091	65592.1	259598	1414.43
D12	8	204286	36075.7	60244.4	251512	2414.23
E1	8	121999	23461.1	52666.4	220969	1591.83
E2	8	111068	22440.2	56965.9	224984	1458.08
E3	8	126641	24261.2	64593.4	238311	2299.29
E4	8	95748.4	23020.4	73407.4	250954	4639.73
E5	8	78750.8	21222.2	82596.5	287704	1954.23
E6	8	102126	24334	88367.5	294076	2809.67
E7	8	109192	23099.6	79369.3	264631	2922.76
E8	8	101046	23224.1	79579.6	272768	2962.6
E9	8	126440	25876.1	76486	265558	2306.24
E10	8	201096	33065.2	70759.9	263644	1453.04
E11	8	220914	37461	71114.5	280698	1657.61
E12	8	213217	36970.3	59380	249558	1793.75
F1	8	110422	23061.6	52571.1	222247	2871.96
F2	8	106434	22513.1	57923.1	231251	2024.27
F3	8	115730	24078.3	67829	252536	3175.65
F4	8	70025.9	18590.7	71663.6	259172	2099.6
F5	8	70119.8	18569.7	74412.3	260587	1748.85
F6	8	82555.4	21657.1	82104.7	280349	2415.09
F7	8	108966	25025.9	81554.4	277475	2607.44
F8	8	97957.1	22956.5	76873.7	268640	2567.24
F9	8	115007	24353.8	74666.8	264429	2485.71
F10	8	210438	34969.5	71615.8	269703	1730.19
F11	8	226507	38489.8	68112.7	268536	1866.83
F12	8	233962	40582.1	64641.4	269239	3002.4
G1	8	168152	32786.8	55099.6	228504	4927.8
G2	8	156378	28286.1	55295.4	228098	1445.94
G3	8	160373	28736.3	60551.6	235558	1721.47
G4	8	94783.5	21475.2	69871.8	257016	2039.75
G5	8	98617.7	21715.8	72017.4	258256	3615.99
G6	8	95949	20882.1	70432.1	248418	2123.36
G7	8	94256.2	21352	71427.1	251963	2071.09
G8	8	96209.5	22157.2	69387	247142	2362.81
G9	8	94265.3	21226.1	67429.6	248073	1434.33
G10	8	234489	37927.2	67738.1	255532	2555.97
G11	8	215685	37029	63812.2	258118	1646
G12	8	266263	47292.4	68634.8	257162	4653.64
H1	8	131947	27562.6	48565.6	213174	4009.74
H2	8	125042	25276.6	49881	210905	2106.37
H3	8	174630	42281.3	75584.5	258496	53355.6
H4	8	83869	21308.9	65575.4	247969	2028.94
H5	8	77213.6	19195.3	63992.8	235154	2798.28
H6	8	98723.7	23085.4	69522.6	245055	4313.95
H7	8	89108.5	20316.8	61843.7	225119	2633.83
H8	8	89457.3	20700.7	62265.7	226487	2183.48
H9	8	164450	31089	70448.7	241436	6356.86
H10	8	204792	35436.4	62167.1	247863	1688.16
H11	8	204625	36910	59335.5	249322	1897
H12	8	191290	35787.9	51933.9	222697	2970.07
A1	9	143095	26375.2	43514.3	195850	2496.73
A2	9	137716	25139.7	44302.4	182761	2521.18
A3	9	153044	26293.9	51204.9	198943	2469.54
A4	9	86620.1	18726.4	54484.6	204966	2664.12
A5	9	86594.6	19503.4	59790.9	218724	2117.16
A6	9	83062.7	17867.9	58056	211076	1582.93
A7	9	83099.7	17784.2	53712.5	198116	1592.8
A8	9	95605.4	19185.4	55631.2	207089	2556.39
A9	9	99112.5	19740	53157.1	202122	2582.71
A10	9	179222	28923.7	49600.8	195732	2793.95
A11	9	173941	29309.8	46711.9	198810	1456.2
A12	9	178104	31627	44873.9	195715	2923.41
B1	9	134262	24752.1	46463.6	204086	2045.53
B2	9	124431	22618.7	46901.9	193831	1669.91
B3	9	140721	26483.9	59777.6	212792	1636.77
B4	9	69014	16416.5	57396	211393	2132.23
B5	9	64832.7	16251.2	59979.1	212536	2193.26
B6	9	73705.3	17618.8	54213.3	182922	10023.1
B7	9	82711.8	18964.9	59893.1	211969	2065.4
B8	9	83725.2	19413.3	61679	221753	1673.96
B9	9	83102.1	18910.5	59259.7	219627	1941.94
B10	9	178722	30032.4	57423.8	224764	2034.01
B11	9	174626	29480.6	49887.4	204843	1709.29
B12	9	177174	31954.2	49894.3	221610	3855.33
C1	9	145752	26441.2	49943	211139	2853.63
C2	9	145265	25678.2	52811.5	210020	2328.8
C3	9	144819	24258.5	53802.1	200502	2345.92
C4	9	78791.3	18001.1	61991.6	216652	2983.72
C5	9	66643.9	16104.8	60508.7	204118	2127.61
C6	9	71169.5	16967.7	63679	213212	2222.61
C7	9	88837.2	19934.7	65570.5	220264	2674.57
C8	9	84863	19018.3	63181.6	219231	2209.5
C9	9	91416.4	20459.6	62876.7	223525	2443.12
C10	9	180271	29553	58949	222748	2650.6
C11	9	187152	30576.7	56348.3	224275	1613.21
C12	9	204132	35397.4	55629.6	229450	2418.66
D1	9	179649	31212.1	54575.8	229938	2208.11
D2	9	168308	28491.5	55704.4	220600	0
D3	9	177535	29594.8	62400.2	228153	3765.71
D4	9	149859	35766.6	77143.8	248161	5998.66
D5	9	100511	23007.7	75249.8	253255	2519.46
D6	9	101181	23441.8	76946.3	246683	1857.63
D7	9	107816	23741.5	76629.7	248751	3125.75
D8	9	90824.5	22207.9	74345	251319	2317.94
D9	9	99178.5	23875	74619.1	255613	3168.3
D10	9	199052	32653.2	67728.1	250739	1728.19
D11	9	197662	33894.1	65576.8	260360	1780.29
D12	9	202270	35809.6	59935.5	249097	2664.34
E1	9	147823	26488.4	52545.4	220975	1315.18
E2	9	135129	25056.9	56918.5	225846	1436.65
E3	9	158246	26908.9	64623.5	238008	1846.53
E4	9	97137.4	22942.8	73217.4	251168	5250.13
E5	9	80012.1	21206.7	82339.9	287212	2204.69
E6	9	102951	24475.1	88633.7	293962	2705.87
E7	9	110144	23252.1	79181.9	264645	3388.99
E8	9	103308	23192.3	79447.2	272690	2815.47
E9	9	128128	25861.6	76718.7	265325	2565.42
E10	9	200714	32942.6	70766.6	263279	1285.61
E11	9	220582	37497	70825.7	280419	1837.6
E12	9	210137	36431.5	59266.9	247038	1540.24
F1	9	136229	26328.5	52714.4	223646	2880.86
F2	9	133595	25775	58191.3	232212	2270.62
F3	9	145897	27560.5	67639.1	252604	3543.89
F4	9	71024.4	18457.8	71812.8	259449	2004.7
F5	9	71062.7	18372.2	74485.5	260911	1503.1
F6	9	83078.8	21578.8	82264.7	280304	2204.77
F7	9	110377	24800.5	81496	277751	2718.21
F8	9	99384.2	23005	77010.6	268883	2167.57
F9	9	116725	24683.9	75081.8	263783	2497.37
F10	9	210543	34604.5	71225.4	269218	1543.6
F11	9	222136	37885.6	67394.2	264438	1840.45
F12	9	231350	40685.9	64183.7	267322	2838.39
G1	9	207241	38267.4	54837.6	228677	4756.57
G2	9	197160	33565.2	55550.1	228635	1753.97
G3	9	203353	33768.9	60931.6	235833	1668.83
G4	9	95728	21631.9	69833	257092	1875.1
G5	9	99243.5	21819.8	72105.6	258462	3592.18
G6	9	97170.6	21062.8	70251.8	248259	2136.42
G7	9	95793.5	21686.1	71700.2	252867	2000.09
G8	9	97055.1	21906.9	69204.9	246316	2365.83
G9	9	95166.9	20918.8	66703.2	245053	1645.84
G10	9	233341	37448.5	67522	253356	2106.44
G11	9	212943	36547	63186.1	254991	1946.43
G12	9	265083	47143.9	68480.2	255247	4906.66
H1	9	162317	32101.4	48232	212482	4022.88
H2	9	156813	29012.2	49788.1	210509	1932.31
H3	9	205459	46007	75525.1	258542	53625.7
H4	9	84048.7	21378.2	65714.5	247718	1926.96
H5	9	77659.8	19195.3	63879.7	234850	2879.54
H6	9	99816.7	22712.2	69583.3	244167	4173.22
H7	9	89866.1	20287.6	61618	223776	2662.48
H8	9	91108.7	20869.6	61576.3	224729	2218.71
H9	9	163991	30711.3	69960.4	239653	6074.17
H10	9	202991	34944.1	61729.6	245738	1871.33
H11	9	203216	36620.6	58626.7	247038	2065.42
H12	9	190274	36021.9	51719.9	221120	2633.91
A1	10	177291	31725.6	43304.8	195950	2319.5
A2	10	171651	28945.6	44148.1	182808	2527.85
A3	10	186616	30371.2	51192.7	199455	2334.95
A4	10	87532.9	18658.3	54656.7	204977	2338.45
A5	10	86305	19554.1	60112.6	219218	1977.99
A6	10	83047.4	17831.5	58235.8	211317	1950.08
A7	10	83334.2	17789.4	53981.7	198565	1770.93
A8	10	96750.4	19387	55981.2	207368	2127.03
A9	10	100035	19691.8	53218.2	201434	2473.86
A10	10	178504	29288.1	49900	195919	2231.35
A11	10	173540	29351	46587.7	198285	2016.81
A12	10	177872	31621.9	45036.1	195807	3087.97
B1	10	175939	29876.4	46619.6	204192	1799.89
B2	10	165566	27481.8	46933.4	194084	1285.09
B3	10	184317	31346.7	59613.9	212446	1580.77
B4	10	68227.9	16164.1	57344.6	211373	2108.51
B5	10	65354.5	16207.2	60401.3	212828	1894.74
B6	10	74008.4	17511.8	54403.8	182653	9713.79
B7	10	84234.3	18761.1	60346.3	211809	2296.57
B8	10	84182.7	19087.1	61960.9	222543	2357.12
B9	10	84318.6	18940.6	59216.8	219337	2110.35
B10	10	178952	29906.3	57603.4	224178	2010.33
B11	10	171412	28692.8	49700.2	202394	2135.68
B12	10	176976	31609.4	50011.9	219741	3908.97
C1	10	192513	32777.3	50046.6	210871	2773.72
C2	10	191862	31210.6	52941.7	209407	2819.19
C3	10	191724	29491.5	54003.1	200812	2337.84
C4	10	78823.7	18241.4	62071.7	216424	3032.58
C5	10	67153.3	16135.9	60568.1	204237	2102.66
C6	10	71744.3	17325.1	63838.2	213791	2259.38
C7	10	89888.4	19701.2	65446.7	220213	2688.38
C8	10	85364.1	19518.7	63639.9	219414	2277.71
C9	10	92110.4	20808.4	62906.1	223453	2527.96
C10	10	180268	29591.3	59053.3	222798	2488.6
C11	10	182845	30381.8	55800.5	221618	1457.87
C12	10	201705	35111	55210.8	228307	2890.56
D1	10	234614	38381	55044.7	229939	2311.07
D2	10	221614	34582.6	56126.4	221146	0
D3	10	233593	35537.3	62473.9	228865	3861.43
D4	10	146733	34345.6	77299.2	248423	6273.89
D5	10	103195	23570.1	75618.1	253790	2549.92
D6	10	101568	23407.9	77078.1	247501	2187.18
D7	10	109068	23596.5	76484.5	248052	3441.77
D8	10	91960.1	22113	74354.8	250900	2637.65
D9	10	101120	23933.9	74774.7	254295	3225.61
D10	10	198994	32604.9	67813	250313	1947.01
D11	10	198034	33964.1	65633.6	260040	1381.76
D12	10	200842	35745.5	59585	248914	2798.29
E1	10	189112	31736.8	52902.9	221794	1578.86
E2	10	175806	29888.6	57101.5	225824	1429.15
E3	10	202786	32823.2	64989.9	238596	2094.97
E4	10	97218.6	23007.4	73381.6	251502	5058.48
E5	10	80206	21323.8	82619	287231	2062.7
E6	10	103867	24578.8	88611.9	294056	2767.08
E7	10	112336	23615.5	79205.7	264805	2929.63
E8	10	104747	23384.9	79314.8	272890	3176.54
E9	10	129648	25690.2	76635.6	264889	2501.15
E10	10	200363	32945.3	70409.6	262694	1325.75
E11	10	220599	37339.2	71022.2	280036	1556.67
E12	10	209786	35987.4	59411.8	246010	1590.94
F1	10	179179	31929.4	52851.2	222397	3054.96
F2	10	178140	30789.5	58365.3	232060	2497.05
F3	10	195832	33372.9	67591	252836	3269.49
F4	10	71109.3	18517.1	71635.4	259062	2109
F5	10	71421	18722.9	74573.2	260637	1685.98
F6	10	83792.2	21557.9	82229.3	280257	2015.08
F7	10	111959	25086.2	81562.3	277455	2508.62
F8	10	101060	23109.9	77147.5	268759	2431.18
F9	10	118150	24642.4	74881.4	264182	2505.44
F10	10	209628	34737.3	71046.5	268695	1686.84
F11	10	220554	37364.2	66934.1	263586	2135.4
F12	10	228932	39776.4	63757.4	264639	2417.29
G1	10	264381	46008.5	55317.5	228755	4713.04
G2	10	256464	40887.5	55647.2	229457	1673.52
G3	10	264899	40870.8	60833.1	235429	1490.21
G4	10	96404.4	21589.4	69958.3	256670	2319.88
G5	10	100136	21801.7	71703.8	258468	3801.05
G6	10	97805.4	20873.2	70082.3	248076	1806.2
G7	10	96747.7	21912.9	71496.1	251781	2063.62
G8	10	99220.2	22136.7	69405.1	246139	2190.22
G9	10	96801.3	20885	66161.4	242315	1578
G10	10	228325	37127.8	66833.9	250037	2506.12
G11	10	210155	36021.7	62619.8	253332	1533.2
G12	10	261969	46778.4	67742.4	252491	4741.71
H1	10	209134	38502.5	48163.4	211900	3622.78
H2	10	206537	35868.1	49980.3	210492	2039.03
H3	10	252045	51773.3	75902.3	258239	53735
H4	10	83789.5	21307.3	65545.6	247444	2176.17
H5	10	77948.1	19209.5	64027.7	234646	2880.9
H6	10	100275	22946	69528.4	244171	4169.71
H7	10	91431.7	20377.2	61415.3	221808	2845.66
H8	10	92945.2	20871	61337.4	223055	2314.91
H9	10	165422	30908.7	69338.7	237336	6230.03
H10	10	201014	34615.6	61306.2	243440	1963.86
H11	10	200796	35985.3	58508.7	245427	2046.59
H12	10	189369	35933.4	51264.4	219975	2910.5
A1	11	226741	38242.2	43511.5	196368	2088.82
A2	11	217697	34710.4	44051.9	182238	2295.42
A3	11	238916	36541	51238.7	198262	2337.04
A4	11	88428	18626.3	54323.4	205560	2837.41
A5	11	87913.7	19763.7	60065.4	218997	1642.44
A6	11	84555.9	17905.2	58071.3	211307	1966.55
A7	11	85634.5	17950.9	54246.8	199220	1833.07
A8	11	99371	19648.8	56191.9	208051	2619.97
A9	11	101274	20214.6	53391.8	201607	2335.55
A10	11	178609	29508.1	50016.8	195557	2093.08
A11	11	172687	29199	46656.9	197669	1908.84
A12	11	179174	31473.7	44713.3	194897	2845.97
B1	11	233374	37627.5	46521	204071	1987.05
B2	11	223295	34342.8	47303.6	194139	1561.46
B3	11	250141	38490.1	60080.2	212922	1624.92
B4	11	68839.7	16325	57289.2	211093	2105.41
B5	11	65764.4	16592.9	60274.2	212340	2189.2
B6	11	73383	17683.9	54552.6	183441	9596.59
B7	11	86499.2	19229.9	60262.4	211664	2252.97
B8	11	86095.4	19250.2	61936.6	223164	2005.99
B9	11	86194.9	18995.6	59170.8	219716	2024.06
B10	11	179794	29902.9	57578.1	224490	2358.73
B11	11	170755	28657.1	49631.7	202527	2175.58
B12	11	172643	31155.3	49658.9	217244	3523.85
C1	11	257962	40725.1	50168.8	211004	2395.23
C2	11	258365	38511.3	53009.2	209835	3154.48
C3	11	256965	36478.9	53907.7	201217	2220.75
C4	11	80089.5	18219	62209	216770	3018.77
C5	11	67031.1	16290.5	60368.6	204291	2079.78
C6	11	72710.5	17130	64110.8	214422	2455.14
C7	11	91967.8	19841.1	65705.2	219803	2580.04
C8	11	87631.6	19583.7	63359.2	219623	2311.26
C9	11	94238.8	20526.8	63052	223317	1973.83
C10	11	181252	29781.6	59097.1	222161	2586
C11	11	182484	30188	55709.9	222356	1888.06
C12	11	202297	34934.9	55249.5	227486	2675.87
D1	11	303860	47184.6	54889.8	229963	2219.32
D2	11	290003	42781.4	56327.2	221279	0
D3	11	305382	43358.1	62491.5	228623	3744.33
D4	11	147105	34519.7	77256.3	248694	6049.67
D5	11	104175	23618.5	75952.7	253657	2476.8
D6	11	102390	23593.9	77176.4	246868	2036.05
D7	11	110866	23894.3	77056.8	248635	3524.44
D8	11	93894.9	22674.8	74334.1	251112	2484.28
D9	11	102346	23911.9	74940	254740	3644.08
D10	11	198255	32695.8	67679	250484	1683.41
D11	11	197783	34007.1	65908.9	261018	1212.99
D12	11	200718	35312.2	59745.2	248782	2712.48
E1	11	249756	39667.1	52924.7	221390	1815.53
E2	11	233799	36609.2	57481.8	226778	1391.66
E3	11	265555	39813.5	64784.4	238518	2194.73
E4	11	98098.1	23000	73537.3	250861	4935.83
E5	11	80459.2	21613.7	82652	288384	2142.07
E6	11	103856	24672.1	88846.6	294007	2908.14
E7	11	114985	23631.1	79361.6	264494	3024.94
E8	11	107993	23731.8	79637.7	272898	2847.96
E9	11	132554	26217.1	76515.1	265492	3003.7
E10	11	199639	32887.6	70595.7	262943	1255.26
E11	11	220871	37507.4	71185.1	280712	1950.7
E12	11	210222	35780.9	59033.7	246311	1344.28
F1	11	240700	40123.9	52607.6	222710	2946.94
F2	11	242588	38543.7	58390.2	231754	2154.26
F3	11	268590	41307.6	67845.4	253503	3524.23
F4	11	71018	18650	71741.6	259505	1684.98
F5	11	71976.4	18610.1	74827.7	260759	1606.79
F6	11	83740.1	21585.5	82461.9	280266	2128.58
F7	11	114532	25076.5	81695.6	277660	2778.77
F8	11	104451	23554.2	77105.5	268544	2437.98
F9	11	120494	24940.3	75015.6	263854	2423.84
F10	11	209762	34793.8	71009.2	268180	1514.39
F11	11	220390	37318.7	67200.7	263714	1750.53
F12	11	228699	39711.5	64026.9	265102	3014.22
G1	11	334306	55772	54927.4	229189	4874.11
G2	11	328506	49874.9	55940.7	229459	1388.78
G3	11	340800	49769.6	61270.3	236050	1739.59
G4	11	96648.6	21650	69948	256284	1918.8
G5	11	100612	21736.9	72210.9	258550	3353.37
G6	11	98612.6	20848.6	70431.3	248497	1935.99
G7	11	99672.9	21848.5	71398.2	251782	2071.09
G8	11	100991	22252.7	69164.8	245448	2111.83
G9	11	99051.3	21215.9	66087.5	242990	1704.91
G10	11	227125	36558	66586.4	249780	2335.36
G11	11	208321	35677.3	62277.3	251863	1646
G12	11	261190	46340	68229.7	251794	4653.64
H1	11	274772	47850.7	48453.9	213219	3393.53
H2	11	272846	44602.7	49834	210089	1833.88
H3	11	316219	59680.2	75869.2	257561	53660.7
H4	11	84517	21444.3	65872.4	247822	1963.76
H5	11	78680	19040.9	63922.3	234646	2842.97
H6	11	100728	22870.5	69711.2	244206	4033.2
H7	11	93910.1	20506.7	60815.4	220129	2828.34
H8	11	95531.5	21206.8	61309.3	222606	1947.72
H9	11	167298	31141.3	69358.7	237056	6039.02
H10	11	201876	34478	61212.8	243299	1712.71
H11	11	200089	35960	58237.5	244143	1997.83
H12	11	188943	35567.4	51597.8	219328	3006.94
A1	12	287942	46550.7	43550.4	195774	2171.81
A2	12	277208	42449.8	44555.1	182866	2515.62
A3	12	305097	43985.8	51292.9	199221	2419.46
A4	12	88571.4	18959.5	54422.7	204986	2670.1
A5	12	88293.6	19746.1	60085.3	219256	1972.27
A6	12	84664.1	17993.6	58209.9	211498	1895.83
A7	12	88806	17869.1	53906.1	198843	1811.32
A8	12	100016	19876.7	55900.8	207721	2463.64
A9	12	103613	20267.3	53356.9	202431	2557.76
A10	12	179580	29371.1	50079.1	195506	2070.43
A11	12	171603	28969	46373.3	197518	2200.91
A12	12	178191	32022.2	45048.3	194988	3291.25
B1	12	305954	47240.5	46762.4	204093	1883.24
B2	12	292288	42298.2	47443.7	194442	1499.66
B3	12	324601	47087.9	60161	212656	1520.47
B4	12	69480.8	16093.6	57279.9	210924	1929.02
B5	12	65916.1	16229.7	60260.9	212845	2020.65
B6	12	73134.7	17486.5	54668.3	183141	9576.42
B7	12	89621.1	19760	60301.3	212194	2301.64
B8	12	89637.2	19456.8	61905	223061	1969.92
B9	12	88412.2	19216.8	58982.7	219786	2055.25
B10	12	180196	30226.7	57823.8	224663	2415.11
B11	12	170780	28566.5	49815.2	202669	1946.18
B12	12	173218	31543.5	49534.6	216823	3855.33
C1	12	330177	49991.9	50577.5	211295	2759.29
C2	12	330680	46999.4	52927.8	210061	2732.52
C3	12	328635	43743.6	54236.9	200619	2091.54
C4	12	79765.8	18130.8	62587.7	216988	2776.59
C5	12	68015.9	16150.4	60198.8	204396	2399.03
C6	12	73572.1	17184	64407.4	214251	2455.14
C7	12	94948.5	20388	65863.8	220434	2723.43
C8	12	90781.6	19696.1	63762.5	219969	2306.78
C9	12	97855.3	21004.8	63244.6	224378	2616.02
C10	12	180699	29506.9	59035.4	222949	2611.84
C11	12	182547	29945.3	55943.9	222294	1514.36
C12	12	201394	34867	55144.8	227809	2745.36
D1	12	378390	56361.8	55152	229801	2233.59
D2	12	361730	50871.2	56415.3	221637	0
D3	12	380124	51789.6	63082	229141	3271.83
D4	12	148136	34478	77391.4	248664	6193.12
D5	12	104554	23750.6	75993.5	253680	2594.6
D6	12	103205	23637.4	77333.2	246898	2340.41
D7	12	116175	23961.1	76664.4	248312	3358.06
D8	12	97308.6	22674.8	74797.9	251296	2637.65
D9	12	107279	24725.1	74869.3	255261	3050.43
D10	12	199306	32718	67862.1	250482	1807.58
D11	12	197650	33874.8	66001.8	260400	1334.94
D12	12	201494	35783.5	59818	249501	3003.4
E1	12	323823	49023.3	53248.5	221701	1387.58
E2	12	305647	45021.9	57595.4	226766	1678.77
E3	12	338975	46993.4	65344.7	238763	2208.16
E4	12	98490.2	23017.6	73483.8	250529	4950.2
E5	12	81809	21446.6	83152.2	287539	2074.17
E6	12	105354	24503.4	88789.9	293984	2912.58
E7	12	120758	24158.6	79416.2	264814	3043.83
E8	12	113162	24128.5	79606.4	272728	2952.67
E9	12	136994	26836.4	77056.2	265086	2542.24
E10	12	201005	32940.8	70345.2	262471	1191.61
E11	12	220848	37278.9	71039	280030	1604.1
E12	12	210042	35881.3	59037.8	246208	1433.35
F1	12	316886	50306.1	52912.5	223330	2905
F2	12	321263	48099.6	58610.8	232492	2410.04
F3	12	354074	51130.4	67738.2	251686	3578.75
F4	12	71159.3	18730.3	71863.4	259247	2101.3
F5	12	71740.5	18603.1	74878.9	261190	1729.25
F6	12	84034.2	21716	82292.3	279987	2150.8
F7	12	119440	25762.6	81663.2	277595	2660.83
F8	12	108924	23973	77126.5	268675	2793.43
F9	12	125465	25310.1	74984.3	263920	2490.2
F10	12	208945	34520.2	71113.6	268377	1635.96
F11	12	220638	37330.3	67319.9	263522	1760.12
F12	12	228172	39675.5	63969.9	264795	2833.96
G1	12	404194	64165	55754.7	229483	4968.43
G2	12	399471	58625.5	55855.4	229705	2051.41
G3	12	413909	58413.2	61119	235902	1687.82
G4	12	97324.2	22081.6	70473.1	257541	2161.48
G5	12	101353	21745.9	72120.4	258386	3606.01
G6	12	99310.7	21073.9	70609.2	248237	1849.21
G7	12	104003	22300	71580	251300	2344.64
G8	12	105720	22752.7	69251.7	246146	2031.19
G9	12	103407	21550	66234.4	242401	1434.33
G10	12	226520	36488.2	66687.4	249148	2660.28
G11	12	208155	35568.1	62479.6	252097	1137.24
G12	12	260962	46444.3	68254.3	252545	4997.53
H1	12	341524	57514.3	48504.5	212363	3447.56
H2	12	343162	53876.4	49987.8	210343	1885.68
H3	12	384389	67960.7	75863.9	257689	53655.6
H4	12	84742.2	21405.6	65615.5	247925	1946.13
H5	12	79015	19381.7	63973.2	234877	2918.15
H6	12	101393	22932.2	69535.6	243879	3950.88
H7	12	98716.2	21059.7	60610.7	220182	2461.31
H8	12	100295	21653.8	61401.1	222353	2080.5
H9	12	171396	31401.2	69351.8	236785	6007.69
H10	12	200697	34573.9	61024.2	243617	1986.52
H11	12	197691	35488.4	57935.4	241254	1971.24
H12	12	187976	35628.9	51537.4	219263	2886.38
A1	13	348984	55350.3	43619.7	194763	2491.11
A2	13	336535	49582.7	44230.2	182918	2562.32
A3	13	370689	51956.4	51363.5	198797	2315.13
A4	13	88136.7	18781.1	54511.2	205505	2524.69
A5	13	88900.3	19524.9	60064.5	219458	1988.47
A6	13	84891.5	18226.5	58103.8	211552	2182.58
A7	13	94003.9	18415.9	54199.4	198955	2070.22
A8	13	105541	20057.2	56381.1	207597	2367.76
A9	13	108366	20764.8	53651.7	202244	2404.7
A10	13	179624	29411.9	49849	195611	2254
A11	13	173599	28944.9	46700.1	198053	1373.15
A12	13	177028	31519.7	44884.6	195219	2920.18
B1	13	372207	56037.1	46738.9	204086	2168.35
B2	13	357205	50343.9	47559.3	194498	1936.96
B3	13	396031	55092.4	60198.7	212852	1546.31
B4	13	68944.3	16643.7	57613.8	211261	1740.24
B5	13	66473.4	16517.2	60496	212991	2018.62
B6	13	74409.7	17551.7	54463.1	183494	9596.59
B7	13	94511	20163.6	60314.6	212635	2532.82
B8	13	94033.8	20295.6	62082.3	223486	1638.95
B9	13	93621.2	19880.2	59117.6	219596	2209.11
B10	13	180329	29921.1	57891	225096	1631.49
B11	13	170580	28533.4	49669.6	202314	1718.02
B12	13	171282	31075.4	49281.9	215860	3745.3
C1	13	393914	58043.6	50874.9	211182	2882.49
C2	13	393981	54809.5	53462.6	210280	2542.06
C3	13	391043	51005.1	54487	200912	2260.11
C4	13	80065.8	18195.6	62459	217524	3162.17
C5	13	68257.1	16023.9	60742.1	204304	1794.85
C6	13	74399.6	17373.8	64417.2	214600	2358.88
C7	13	100328	20803.3	65730.2	220948	2843.46
C8	13	96530.2	20311.2	63499	220653	2116.7
C9	13	103095	21399.8	63291.4	223701	2981.15
C10	13	181590	29593.2	59372.3	222796	2417.04
C11	13	183148	30360.1	56135.9	222180	1562.16
C12	13	201847	34997.4	55391.8	227448	2837.67
D1	13	438945	64492.7	55193.6	230207	2311.07
D2	13	421870	57773.8	56469	222056	0
D3	13	443160	58527	62908.7	228802	3934.75
D4	13	148694	34628.6	77396.8	248445	6324.89
D5	13	105418	23857.9	75921	253898	2495.08
D6	13	103958	23619	76978.7	247448	2550.31
D7	13	122694	24830.5	76673.9	249026	2977.15
D8	13	104486	23565.4	74487.6	250582	2595.53
D9	13	113911	25309.8	74867.1	254916	3528.38
D10	13	199418	32748	67762.9	250831	1261.03
D11	13	198348	33852.2	66116.5	261684	1154.19
D12	13	200847	35504.4	59702.5	249010	2648.64
E1	13	393952	58255.8	53345.5	222112	1559.41
E2	13	375896	53496.8	57842.3	227216	1478.44
E3	13	416320	55932.7	65508.5	239193	1938.61
E4	13	99159.5	23026.8	73591.7	251192	5148.55
E5	13	81430.4	21353.3	83014.4	287541	2078.58
E6	13	105684	24859.4	88965.3	294568	3119.29
E7	13	130473	25131.2	79596.8	265002	2778.51
E8	13	121697	24996.1	79690.5	272820	2715.27
E9	13	145594	27315	76840.2	265057	2732.93
E10	13	200246	33068.9	70683.1	262515	1155.38
E11	13	221021	37660.5	71227.1	280475	1450.87
E12	13	209972	36099.1	59273.8	246394	1558.05
F1	13	387781	59417.9	53136.6	223815	3123.58
F2	13	394204	57321.9	58552.4	232338	2401.66
F3	13	438659	60969.6	67981.7	252723	3628.8
F4	13	71866.5	18776.3	72009.1	259163	2001.28
F5	13	72169.1	18701.9	75071.6	261227	1593.72
F6	13	83786.5	21570.6	82522.6	279526	2132.55
F7	13	128193	26542.4	81605.7	277662	2467.18
F8	13	117365	24566.7	77255	268664	2494.96
F9	13	133580	26103.9	74809.9	263484	2500.06
F10	13	208606	34676.3	71257	267944	1832.91
F11	13	221004	37190.4	67132.3	263108	1673.79
F12	13	228230	39834	63958.5	265068	3246.2
G1	13	457625	72407.3	55632.5	229298	4406.87
G2	13	454649	65598.9	56046.4	230267	1628
G3	13	468815	65277.7	61180.6	235585	1592.04
G4	13	97801.3	21870.5	70549.3	257503	1947.67
G5	13	101873	21859	72216.4	258120	3606.01
G6	13	99920.1	21032.3	70324.2	248246	1931.38
G7	13	112267	23062.6	71721	251425	2191.42
G8	13	113526	23627.9	69309.9	245460	2372.61
G9	13	111019	22329	66180.7	242452	1333.76
G10	13	226856	36434.9	66687.4	249158	2363.05
G11	13	208330	35576.1	62550.8	251657	1643.7
G12	13	261303	46368.6	68578.7	252115	4481.7
H1	13	398493	65586.3	48260.2	211537	3558.53
H2	13	402279	61978.7	50068.9	210462	2077.36
H3	13	441125	75079.5	75608	257783	53757.3
H4	13	86024.4	21350.8	66115.1	247837	1848.75
H5	13	79005	19408.6	64168.7	234774	2903.25
H6	13	101483	22989.6	69704	243513	4306.21
H7	13	107067	21785	60929.3	219673	2556.56
H8	13	108674	22433.1	61530.5	222790	2071.7
H9	13	178812	32503.9	69551.1	237434	6249.9
H10	13	201001	34423.7	61482.5	243639	1826.01
H11	13	196636	35528.8	57753.5	241325	1923.59
H12	13	188518	35627.4	51375.5	219396	3028.22
A1	14	400221	62565.6	43686.3	195366	2541.74
A2	14	381819	55455.8	44271.8	182094	2174.19
A3	14	424456	57927	51415.7	199093	2680.29
A4	14	89580.5	18797.6	54636	205380	2769.69
A5	14	88741.8	19721.8	59763.5	219507	2202
A6	14	84789.9	18062.4	58367.8	211363	1930.71
A7	14	101361	19487.7	53993.8	198360	2056.76
A8	14	113242	21043	56103.3	207822	2734.6
A9	14	115837	21332.2	53667	201799	2194.96
A10	14	179694	29350.6	50187.9	195946	2348.16
A11	14	172463	29294.2	46535.4	197418	2544.2
A12	14	177282	31531.6	45196.7	194971	3013.76
B1	14	419996	62531.3	46900.8	204099	1951.96
B2	14	405920	55962.5	47592	194228	1745.71
B3	14	450583	61544.1	60385	213170	2005.04
B4	14	69343.6	16264	57403.2	210516	1980.6
B5	14	66290.5	16548.9	60435.9	212787	1952.61
B6	14	74578.9	17735.5	54479.7	183223	9898.23
B7	14	102931	21028	60297.2	212092	2144.48
B8	14	102313	20842.2	62217.4	222598	2029.33
B9	14	102175	20539.5	59350.7	219752	2003.27
B10	14	180355	29723.3	57975.9	225266	2146.76
B11	14	169963	28616.3	49494.6	202667	1709.29
B12	14	170933	30804.9	49223	215860	3918.6
C1	14	439230	63855.4	50462.9	211558	2624.98
C2	14	440638	59809.8	53513.8	210342	2854.55
C3	14	435507	55920.7	54325	201012	2128.89
C4	14	81003.6	17837.4	62444.9	217562	2944.42
C5	14	68291.3	15967.9	60718.8	204407	2383.43
C6	14	74338.5	17150.1	64700.8	215449	2222.61
C7	14	109958	21629.9	65778	220584	2880.63
C8	14	106318	21230.4	63870.2	220114	2567.32
C9	14	112488	22461.8	63293.6	224323	2552.66
C10	14	180900	29587.4	59203.4	222305	2702.28
C11	14	182012	30497.3	56254.5	222572	1327.51
C12	14	201296	34776.8	55283	227777	2806.56
D1	14	481637	69954.6	55308	230220	2588.36
D2	14	462470	62569.8	56506.6	222330	0
D3	14	485750	63206.2	62911.8	229562	3509.1
D4	14	148606	34545.1	77203.8	248352	6235.63
D5	14	106545	23763.9	76002.7	253499	2415.87
D6	14	104387	23675.2	77440.9	247175	2166.19
D7	14	134594	25952.4	76864.3	248205	3298.41
D8	14	116826	24637.1	74661.8	251208	2684.1
D9	14	125833	26228.8	75039	255253	3958.75
D10	14	199288	32686.1	68088.2	250973	1438.12
D11	14	198357	33939.3	66438.8	261568	1481.94
D12	14	201174	35758.5	59797.2	248869	2714.57
E1	14	446589	65248.1	53367.3	222561	1865.24
E2	14	429254	60095.2	57761.8	227756	1377.73
E3	14	473310	61959.8	65237.1	239421	2268.59
E4	14	99760.8	23128.5	73831.4	250976	5135.14
E5	14	82144.5	21476.9	82888.7	287695	2062.7
E6	14	106078	24734.5	88988.9	294146	2909.92
E7	14	147017	26387	79632.5	264803	3018.93
E8	14	138169	26239.2	79415.9	272912	2815.47
E9	14	160201	28622	76768.5	265165	2432.67
E10	14	199213	33052.6	70650.4	262171	1076.07
E11	14	221457	37227.9	71440.3	280175	1601.67
E12	14	208880	36182.6	59102.7	246202	1630.68
F1	14	439765	66873.2	53050.6	222945	3175.68
F2	14	451085	64241.8	58818.4	232368	2460.36
F3	14	501347	67865.9	68037.1	252804	3401.78
F4	14	72157.8	18674.3	71844.5	258959	2227.83
F5	14	72489.2	18697.2	75209	261588	1610.05
F6	14	84338.8	21695.2	82585.7	279960	2257.94
F7	14	144126	27805.9	81959	277416	2632.94
F8	14	132846	26011.6	77235.7	268938	2652.27
F9	14	147206	27683.1	74887.7	263140	2523.38
F10	14	209160	34558.8	71490.9	268399	1538.89
F11	14	219898	37202	67161.8	262693	1564.68
F12	14	227339	39672.6	64038.3	264844	2770.43
G1	14	490674	77499.3	55766.5	229702	5043.88
G2	14	488795	70433.7	56048.6	229582	1915.92
G3	14	506092	69448.5	61368.8	235813	1608.43
G4	14	98092	21987.9	70645.3	257275	2141.19
G5	14	102159	21843.2	72197	258301	3741.16
G6	14	100581	21219.7	70512.2	247977	1650.31
G7	14	127166	24590	71686.1	251821	2092.76
G8	14	127825	24905.4	69526	245668	1939.24
G9	14	124577	23847	66372.5	242830	1489.4
G10	14	226109	36573.7	66722.7	249822	2578.12
G11	14	207038	35760.2	62627.7	251572	1693.19
G12	14	261049	46302.9	68530.8	252373	5038.07
H1	14	436699	71909.8	48681.7	211749	4303.24
H2	14	443835	67074.5	50264.3	210619	2029.7
H3	14	479253	79896	75751.3	257474	53387.2
H4	14	85784.4	21505.6	66021.6	247650	2214.51
H5	14	79083.6	19533.3	64163.1	234629	2880.9
H6	14	101219	23195.1	69683	244092	4394.87
H7	14	122521	23536.9	60729.4	219633	2494.62
H8	14	124245	24177.2	61303.9	222782	2267.49
H9	14	193277	34188.9	69449.9	237093	5904.55
H10	14	200977	34448.9	61401.4	243780	1706.1
H11	14	196665	35328.2	57498.9	240934	1993.4
H12	14	188518	35678.4	51496.3	219391	2802.7
A1	15	433726	66898.9	43644.7	195210	2306.84
A2	15	411602	59810.4	44478.5	182715	3023.85
A3	15	459796	62304.8	51580.5	198681	2312
A4	15	89806.1	18702.7	54527.9	205789	2574.49
A5	15	89075.4	19707.1	60103.2	219857	2048.53
A6	15	85284	17899.3	58600.1	210789	2145.77
A7	15	117250	20885.8	54318.4	198489	1650.79
A8	15	128951	22662	56276.3	207627	2240.62
A9	15	129936	23255.8	53499.9	201755	2784.51
A10	15	178761	29105.3	49666.5	195430	2227.77
A11	15	171815	28862.5	46823	196878	1673.52
A12	15	177783	31034.2	45130.9	193839	2807.25
B1	15	451751	66121.2	46894.9	204324	1656.6
B2	15	438241	59708.7	47356.1	194219	1792.36
B3	15	486133	65700.6	60480.8	213174	1740.14
B4	15	69101.8	16102	57630.2	210692	2324.1
B5	15	66437.9	16440.5	60825.6	213204	1948.55
B6	15	74361	17791.9	54589.5	183289	9617.73
B7	15	119683	22369.3	60342.2	212844	2179.97
B8	15	119183	22648	62143.5	222817	1881.88
B9	15	118539	22222.5	59426.3	219437	1670.6
B10	15	179794	29848.3	57779.8	224920	1896.46
B11	15	171031	28339.6	50015.9	202582	1745.45
B12	15	171305	31062.8	49590.7	215880	4076.77
C1	15	467705	67631.5	50751.5	211606	2605.01
C2	15	468822	63705.3	53609.1	210934	2422.32
C3	15	463603	59109.8	54396.8	200957	2297.46
C4	15	81203.2	18124.4	62539	217209	2898.74
C5	15	68421.8	15757.3	60767.6	204486	2226.4
C6	15	74457.6	17402.5	64644.1	214687	2398.9
C7	15	127629	23172.7	66189.6	220652	2318.74
C8	15	123333	23079.9	63707.5	221066	2358.22
C9	15	130282	24348.4	63435.1	224789	2074.77
C10	15	180802	29492.2	59156.7	222501	2602.89
C11	15	182496	30021.5	56284.7	222942	1640.37
C12	15	201995	35079.1	55407	228322	2775.44
D1	15	508641	73453	55370.8	230234	2760.64
D2	15	489285	65935.6	56491.5	222690	0
D3	15	513590	66247.1	63218.9	229420	3744.33
D4	15	148572	34538	77328.2	247860	5974.22
D5	15	106364	23979.5	76241.4	253279	2174.19
D6	15	104969	23718.8	77383.4	247394	2161.99
D7	15	156234	27830.6	77054.7	248379	3428.17
D8	15	139692	26539.4	75148.5	251722	2515.6
D9	15	147643	28201.4	75250	255636	3695.99
D10	15	200915	32800.2	68045.3	251218	1777.04
D11	15	198668	34100.7	66289.1	261764	1156.37
D12	15	201872	35580.4	59793	249235	3070.37
E1	15	481253	69449	53467.6	222700	1549.68
E2	15	463645	64001	57713.3	227490	1496.65
E3	15	517995	67676	65909.8	239215	2386.58
E4	15	99411.1	22976	73655.7	251248	5479.14
E5	15	82884.8	21453.2	83166.9	288155	2281.41
E6	15	106343	24577.2	89013.3	294562	2976.46
E7	15	175490	29099.4	79618.1	265010	3004.33
E8	15	166174	28803.8	79970.4	273317	2513.97
E9	15	186814	31225.5	76872.4	264679	2418.97
E10	15	199701	32848.9	70640.9	262464	1498.08
E11	15	221107	37350.8	71526.6	280682	2004.22
E12	15	209642	35956.3	59141.3	246120	1597.79
F1	15	475609	71510.5	53483.2	223042	3304.03
F2	15	486260	68897	58828.1	232441	2376.5
F3	15	541513	72590.8	68193.4	253333	3473.28
F4	15	72042.7	18274.7	72091.4	258315	1913.23
F5	15	72361.8	18662.2	75183.8	261423	1728.44
F6	15	84484.4	21719	82654.3	279479	2028.58
F7	15	172895	30363.3	82113.6	277371	2452.84
F8	15	159448	28603.3	77189.5	268597	2523.02
F9	15	173512	29955.3	74963.7	263042	2284.85
F10	15	208375	34393.8	71560.8	269269	1918.67
F11	15	219797	36875.4	67004.9	263198	1509.53
F12	15	227022	39528.5	64125.3	264966	2816.23
G1	15	513116	80073.8	55647.2	230116	5029.37
G2	15	511991	73208.4	56421.9	229848	1753.97
G3	15	527874	72185.2	61424.3	236239	1837.1
G4	15	99117.4	21900.4	70558.8	257076	2210.64
G5	15	102354	21826.6	72075.5	258280	3821.02
G6	15	101368	21110.4	70419.7	247605	1834.62
G7	15	153252	27151.8	71825.6	251468	2108.46
G8	15	153062	27551.5	69385.5	245781	2078.67
G9	15	149573	26321.6	66449.5	242851	1242.76
G10	15	226259	36508.4	66644.8	249230	2387.05
G11	15	207470	35669.3	62538.4	251365	1575.79
G12	15	260224	46441.4	69102.9	252399	4689.99
H1	15	461122	74964.3	48693.6	211755	3914.82
H2	15	466854	70078.6	50324.1	210637	1807.98
H3	15	503102	82789.2	75565.2	257222	53421.4
H4	15	85755.9	21464.5	65888.1	247915	1942.29
H5	15	79347.3	19251.3	64237.2	234558	2586.31
H6	15	100912	22890.8	69740.1	243674	3995.21
H7	15	148628	26006.6	60862.9	219449	2613.18
H8	15	151170	26825.1	61615.4	223075	2153.67
H9	15	219338	36566.1	69515.8	236564	5839.6
H10	15	201155	34409.1	61517.4	243212	1953.47
H11	15	196685	35237.1	57706.1	240837	2017.78
H12	15	188761	35312.4	51689.7	217782	3133.18
A1	16	453694	69746	43722.4	195310	2187.28
A2	16	440011	63021.9	45192.9	185948	2480.03
A3	16	480871	64658.6	51341	198645	2232.7
A4	16	90075.1	18992.5	54617.3	205649	2347.41
A5	16	89128.2	19763.7	60046.6	219614	2251.57
A6	16	85405.3	18233.3	58343.8	211798	2003.36
A7	16	144180	23652.9	54204.5	198455	2011.19
A8	16	155004	24789.7	56217.3	207332	2433.42
A9	16	155306	25738.8	53593.8	202298	2608.78
A10	16	179391	29134.2	50149.4	195150	2287.37
A11	16	171179	29424.8	46585	196996	2396.08
A12	16	176998	31259	44985.6	194920	3204.13
B1	16	470203	68514	46990.6	203422	1843.76
B2	16	456893	61913.7	47719.3	193959	2086.22
B3	16	506452	67839.9	60618.7	213627	1571.08
B4	16	70279.4	16257.7	57820.3	211166	2261.18
B5	16	66278.7	16578.6	60651.6	213340	1988.15
B6	16	74837.4	17476.8	54599.3	182854	9521.67
B7	16	147697	24683.1	60690	212609	2246.89
B8	16	148265	25318.2	62199.5	223477	1352.53
B9	16	147268	24970.7	59406.9	220248	1856.69
B10	16	180334	29506.3	58045.3	224768	1681.1
B11	16	171247	28080.9	50036.7	202635	1875.11
B12	16	171660	30747.4	49465.1	216464	4017.63
C1	16	483029	70034.4	50590.7	211324	2974.61
C2	16	486411	65343.4	53410.3	209997	2916.13
C3	16	479595	60494.1	54451.1	201765	2229.83
C4	16	80728.4	18254.1	62387.6	217387	2875.38
C5	16	68199.2	16140.1	60956.4	204970	2118.26
C6	16	75212.5	17473.5	64861.1	214962	2551.4
C7	16	158777	25924.8	66183.1	220523	2538.61
C8	16	155263	25544.4	64312.5	220402	2397.36
C9	16	161043	26740.3	63737.6	224092	2511.85
C10	16	180948	29556	59233.2	222251	2477.67
C11	16	182642	29949.6	56264.2	222481	1417.67
C12	16	199543	34336.5	55236.3	226902	2756.77
D1	16	525013	75312.4	55605.7	230489	2088.83
D2	16	504349	68105.4	56812.6	222163	0
D3	16	530324	68015.5	63126.6	229216	3644.53
D4	16	149324	34467.8	77346.4	248780	5985.91
D5	16	107111	23899.7	76072	253977	2477.82
D6	16	105479	23732.3	77507.9	247202	2257.5
D7	16	192948	30667.3	76996.8	248600	3205.28
D8	16	176559	29778.2	74909	251499	2566.36
D9	16	182946	31413.3	74850.8	254575	3481.88
D10	16	200907	32794.4	68262.2	251160	1898.16
D11	16	197308	33964.1	66265.1	261459	853.666
D12	16	200975	35244.8	59951.1	249117	2607.83
E1	16	502483	72436.1	53369.4	222449	1703.14
E2	16	484067	66390.3	58156.5	227410	1593.07
E3	16	535337	68970	65212.8	238829	2194.73
E4	16	100284	22937.2	73748.3	250927	5289.41
E5	16	82674.7	21449.1	83121	287967	2210.86
E6	16	106701	24252.1	89064	293921	2919.68
E7	16	222601	33033.4	79769.7	264496	3002.61
E8	16	213205	33119.2	79907.8	273070	2924.69
E9	16	230131	35524	77132.1	264773	2226.17
E10	16	200880	33104	70722.4	262411	1222.94
E11	16	220650	37589.7	71610.4	280624	1975.03
E12	16	209551	35704.6	59037.8	246734	1615.61
F1	16	497414	74271	53170.5	223128	2991.42
F2	16	507513	71453.9	58762.1	232452	2250.7
F3	16	566109	75173.3	68117.9	253430	3446.47
F4	16	72688.8	18630	71897.6	258533	2169.7
F5	16	72773.5	18563.5	75248.8	261361	1989.7
F6	16	84578	21738.4	82699.3	279437	2416.67
F7	16	218198	34483.3	81978.7	277051	2685.53
F8	16	204803	32915.6	77428.8	268236	2530.67
F9	16	216515	34371.9	75145.2	262853	2753.83
F10	16	208993	34111.3	71579.4	267813	1749.98
F11	16	220285	36838.1	67247.9	263375	1844.05
F12	16	226436	39534.2	64400.5	264146	2795.54
G1	16	524570	81812.4	55613.4	230048	4589.7
G2	16	523428	74789.4	56353.9	229732	1661.88
G3	16	541670	73678.5	61517.5	235739	1760.3
G4	16	99159.3	21957.9	70796.8	257476	2275.4
G5	16	103711	21721.8	72263.6	258695	3748.07
G6	16	101579	21242	70577.7	247378	1867.64
G7	16	196559	31256.1	71769.9	251031	2171.99
G8	16	195191	31296	69469.4	245822	2218.1
G9	16	189944	30347.2	66382.9	243158	1665
G10	16	226612	36347.6	66428.7	249570	2265.2
G11	16	207478	35518.1	62710.2	251994	1518.23
G12	16	259873	46395.7	69493	252784	5121.94
H1	16	476046	76577.4	48376.4	211518	3082.5
H2	16	481282	72226.9	50215.2	210494	2085.65
H3	16	516595	84422.5	75672.7	257363	53582.9
H4	16	85755.9	21258.1	66003.6	247871	2084.15
H5	16	79357.3	19371	64223.2	234352	2791.5
H6	16	101390	23009.2	69688.8	243870	3910.77
H7	16	191077	30379.5	60934.1	219769	2741.08
H8	16	193628	31111.5	61681.1	222965	2217.35
H9	16	260696	40787.6	69490.5	236922	5854.88
H10	16	200030	34338.4	61497.6	243590	1915.71
H11	16	196991	34948.8	57716	241392	1903.65
H12	16	189314	35282.4	51460.6	219034	2700.58
A1	17	465186	71621.9	43727.9	194645	2520.65
A2	17	447954	64238.4	45156.8	185205	2629.05
A3	17	493555	65969.4	51482.2	199127	2403.81
A4	17	89979.9	18465.4	54559.3	205346	2535.65
A5	17	88785.8	19417.7	59905.1	219978	2081.89
A6	17	85619.6	18165.6	58468.2	211316	2014.02
A7	17	186893	27512.5	54463.5	198919	1953.2
A8	17	198416	29206.6	56308.9	207257	2496.99
A9	17	196486	29779.6	53451.9	201707	2468.2
A10	17	178767	29339.8	50184.5	194899	2240.88
A11	17	170891	28834.1	46518.4	197335	2191.22
A12	17	177587	31349.3	45498.1	194815	3475.18
B1	17	482176	69827.3	46990.6	204121	1653.68
B2	17	467538	63015.6	47493.9	194186	1674.58
B3	17	519630	69370.1	60939.6	213443	1243.73
B4	17	70300.8	16308.2	57905.5	211456	2393.22
B5	17	66939.2	16330	60604.8	212845	1950.58
B6	17	74852.6	17581.8	54590.5	183147	9709.95
B7	17	192243	29039.6	60681.8	212474	2403.04
B8	17	195092	29284.7	62239.6	223000	1852.17
B9	17	193398	29616.8	59386.5	219824	1918.03
B10	17	180381	30110.8	58048.6	225314	1997.93
B11	17	170183	28375.3	49799.3	202392	1655.68
B12	17	171648	30467.1	49390.2	215919	4537.54
C1	17	495281	71262.4	50629.2	211350	3001.25
C2	17	496569	66922.8	53597.5	210359	2717.69
C3	17	490491	61932	54760.8	201128	2352.98
C4	17	82316.9	18245.6	62497.9	218052	3101.62
C5	17	68681.7	16045.7	61249.3	205196	2206.65
C6	17	74813.8	17396.1	64673.5	214896	1960.87
C7	17	206823	30203.9	66230.9	221214	2614.03
C8	17	204520	30360.9	64102.8	220567	2686.96
C9	17	210344	31609.1	63465.5	223841	2180.02
C10	17	180171	29591.3	58855.6	222501	2449.84
C11	17	181500	30339.4	56403.3	222994	1417.67
C12	17	200679	34664.3	55355.2	227325	2568.01
D1	17	535371	76572.4	55585.5	230686	2217.28
D2	17	514900	69021.4	57177.7	222619	0
D3	17	540284	68877.4	63432.7	229409	3615
D4	17	149785	34531.9	77359.3	248575	6045.42
D5	17	106978	23889.3	76093.5	253746	2844.42
D6	17	105603	23533.8	77669.9	247243	1985.67
D7	17	250981	35328.9	77094.7	248497	3173.88
D8	17	235948	34726.4	74821.9	251142	2280.13
D9	17	241050	36575.8	75328.4	255369	3436.47
D10	17	200371	32582.6	68424.8	250973	1423.87
D11	17	197828	33610.1	66567.8	261812	1468.87
D12	17	201125	35241.6	59957.4	248952	2883.05
E1	17	515708	73996.3	53394.5	222000	1711.78
E2	17	497253	68035.9	58109.1	227538	1363.8
E3	17	550322	70482	65646.1	238487	2372.19
E4	17	100238	23207	73727.3	250645	4977.03
E5	17	83209.6	21623.5	83179.9	287923	1965.7
E6	17	106640	24614.5	89155.6	294051	3168.97
E7	17	292269	39149.9	79653	264318	2774.22
E8	17	283419	39338.9	80096.6	273100	2748.67
E9	17	297041	41808.6	76987.7	265368	2405.28
E10	17	200321	33027.4	70737.8	262313	1129.93
E11	17	220495	37396.1	71511	280992	1275.74
E12	17	209898	35720.1	59282.1	247096	1562.16
F1	17	508980	76011.8	53708.6	223463	2924.06
F2	17	520032	73003.4	58712.4	231860	2332.47
F3	17	581251	77244.8	68356	253091	3071.07
F4	17	72313.4	18778	71676.5	258530	2038.04
F5	17	72868.8	18547.2	75261	262142	1546.37
F6	17	84856.6	21659.3	82880.6	279680	2257.94
F7	17	286665	40843.8	82302.9	277765	2498.26
F8	17	273781	39044.8	77457.4	268599	2472.85
F9	17	281011	40589.5	75141.7	262451	2568.21
F10	17	208320	34107.8	71556.1	268525	1633.13
F11	17	220819	37319.8	67323.4	263517	1619.84
F12	17	227829	39834	64205.1	264723	3178.23
G1	17	533714	83110	55519.2	230138	4454.75
G2	17	531927	75582.6	56173.7	229876	1841.82
G3	17	550022	74625.4	61660	236191	1750.81
G4	17	100157	21960.3	70779.3	257446	2071.74
G5	17	104028	22112.9	72249.7	258390	3537.66
G6	17	102464	21229.4	70601.5	247605	1897.59
G7	17	261375	37415.8	71793.7	250384	2003.07
G8	17	257731	37648.5	69470.9	245259	2244.48
G9	17	251817	36588.8	66447.1	242464	1758.39
G10	17	225447	36411.9	66892.4	249198	2545.82
G11	17	206830	35358.9	62604	251922	1799.09
G12	17	260804	46180.1	69612.1	252470	4462.13
H1	17	485206	78129.3	48857.5	210702	3434.41
H2	17	489645	73121.9	50411.6	209934	2011.05
H3	17	525541	85679.6	75973.1	256908	53662.4
H4	17	85890.1	21491.9	65958.8	247632	1956.1
H5	17	79764.2	19430.5	64230.2	234487	3004.83
H6	17	101677	22869.8	69889	243921	4190.11
H7	17	253660	36580.2	61059.5	219496	2691.79
H8	17	256047	37489	61801.6	222487	2295.26
H9	17	322870	47555.6	69602.4	236590	5900.73
H10	17	200960	34339.4	61457	243225	1875.11
H11	17	195838	35429.6	57753.5	240785	1942.43
H12	17	188407	35292.9	51707.5	218633	3067.93
A1	18	472426	72372.9	43955.5	195489	2246.36
A2	18	455395	64847.3	45105.3	185421	1995.14
A3	18	503001	67293.3	51808.7	198542	2398.59
A4	18	91092.4	19008	54747.1	204988	2780.65
A5	18	88732.9	19462.5	60248.5	219551	1891.24
A6	18	85983.6	17919	58553.3	211589	2204.86
A7	18	247306	33448.5	54359.7	198755	2009.12
A8	18	257811	35902.2	56617.2	207257	2506.37
A9	18	254746	36069.6	53711.8	201977	2295.86
A10	18	179138	29228	50392	195267	2432.79
A11	18	170596	28872.5	46651.7	196715	1472.81
A12	18	177071	31463.5	44987.1	193939	3317.07
B1	18	489208	71202	46903.7	203948	1729.71
B2	18	475712	64187.7	47576.8	194002	1546.3
B3	18	528370	70241.4	61329.4	214085	1857.51
B4	18	70279.4	16483.9	58275.3	212100	2355.05
B5	18	66843.5	16346.3	60846	213296	2328.31
B6	18	74908.3	17514.7	54518.6	182967	9448.66
B7	18	257833	35015.7	60900.7	212863	2233.71
B8	18	261869	36011.4	62276.6	223274	1636.83
B9	18	260803	36268.8	59614.4	219924	1736.1
B10	18	178859	29665.4	57892.1	224840	1950.58
B11	18	170610	28272.1	50037.9	202146	1715.53
B12	18	171305	30919.8	49327.3	215963	4028.63
C1	18	502328	72151.6	50988.3	211996	2826.99
C2	18	502957	67694.1	53692.8	210774	3084.92
C3	18	498672	62814.3	54627.5	201680	3003.05
C4	18	82205.8	18403	62803	217919	2660.81
C5	18	69141.4	16217.9	61113.5	205150	2333.51
C6	18	74917.4	17100.3	64808.7	214947	2094.98
C7	18	276235	36225.5	66442.6	221426	2371.85
C8	18	273786	35987.6	64458.1	220934	2596.39
C9	18	279744	38246.9	63738.7	224586	2653.61
C10	18	180636	29297	59372.3	222491	2536.31
C11	18	182115	30302.4	56299.8	223239	1691.43
C12	18	200066	34689.8	55224.1	227458	2729.81
D1	18	542630	77576	55585.5	230717	2255
D2	18	522893	69523.6	56824.4	222593	0
D3	18	547530	69756.5	63175.4	229283	3535.57
D4	18	150630	34852.6	77627.3	248550	5883.89
D5	18	107445	24037.5	76109.8	253535	2300.11
D6	18	106559	23928.9	77558	247395	2036.05
D7	18	329629	42531.3	77094.7	248815	3476.31
D8	18	311724	41930.8	74769.6	251305	2604.17
D9	18	319254	44325.6	75209.8	254800	3676.52
D10	18	199936	32542	68489.3	251223	1685.44
D11	18	197465	33562.7	66424.6	261177	1367.61
D12	18	201436	35305.6	60089.5	248562	2946.89
E1	18	523423	75377.3	53753.1	222559	1449.18
E2	18	506436	68909.6	58267.8	228022	1391.66
E3	18	559761	71411	65590.9	238632	2082.5
E4	18	100130	23380.7	73403.6	250718	5207.96
E5	18	83472	21716	83352.4	287969	2097.98
E6	18	107033	24676.1	89080.5	294206	2914.35
E7	18	379801	46919	79784.2	264812	2907.3
E8	18	373840	47665.2	80105.5	273304	2877.75
E9	18	382152	50038.7	77147.7	265361	2421.08
E10	18	199613	32887.6	70633.2	262505	1427.58
E11	18	220698	37341.6	71525.4	281523	1773.15
E12	18	209546	35396.3	59536	246958	1529.28
F1	18	518246	76686.5	53474	223210	3292.59
F2	18	529488	73889.1	58911.4	231711	2353.43
F3	18	591578	78451.3	68587.7	252872	3526.01
F4	18	72557.1	18773.8	72002.2	258461	2034.62
F5	18	73084.9	18705.8	75491.1	261553	1791.3
F6	18	84710.9	21593	82670.9	279327	2384.13
F7	18	372669	48901.5	82325	277110	2735.74
F8	18	361391	47564.6	77564.1	268372	2524.72
F9	18	365601	48707.7	75125.6	262046	2719.76
F10	18	208090	34348.1	71580.4	268216	1777.31
F11	18	219578	37263.8	67343.5	263890	1755.32
F12	18	227106	39309.4	64065.4	264718	2835.44
G1	18	539046	83110	56056.5	230233	4485.23
G2	18	537071	76263.7	56246	230263	1427.94
G3	18	556309	74964	61557.1	236031	1441.89
G4	18	101230	22054.8	70930.9	257669	2024.14
G5	18	105607	22158.1	72324	258304	3756.51
G6	18	104359	21228.6	70599.2	247600	2151.78
G7	18	344075	45519.2	72090.5	251448	1953
G8	18	337868	45188.2	69656.8	245599	2118.62
G9	18	332543	44529.1	66726.5	242251	1541.28
G10	18	225810	36246.5	66733.8	249237	2299.36
G11	18	206468	35370.3	62814.2	252157	1776.07
G12	18	259915	46708.4	69501.2	252782	5123.34
H1	18	489893	79006	48351.1	211139	3741.06
H2	18	495415	73951.2	50309.1	210432	1832.84
H3	18	530570	86090.4	75815.9	257391	53317.2
H4	18	85727.4	21413.7	65991.8	247360	2064.21
H5	18	79369.9	19385.2	64209.2	234538	2888.35
H6	18	101688	22974.3	69808.8	243944	4061.35
H7	18	329432	44339.5	61218.1	219867	2638.5
H8	18	332877	45664.2	61844	222829	1972.79
H9	18	397787	55607.4	69547.2	237106	5893.09
H10	18	200495	34054.5	61439.1	243035	1834.51
H11	18	196127	35218.6	57749.1	240653	1891.46
H12	18	188131	35511.9	51794	218094	2621.15
A1	19	478046	72845	43894.4	195013	2640.21
A2	19	459459	65467	45181.9	185296	2268.72
A3	19	510314	67848.6	51772.9	198758	2221.23
A4	19	89992.9	18880.1	54812	205243	2627.27
A5	19	89001.6	19588.2	60016.4	219649	2166.73
A6	19	86189.1	18075.2	58408.9	211374	2097.33
A7	19	318455	40572.3	54407.1	198591	1680.83
A8	19	328613	43212.1	56524.6	207428	2431.34
A9	19	324438	43595.3	53588.4	201462	2587.24
A10	19	179035	29053.6	50075.7	195065	2493.58
A11	19	171080	28841.2	46633.4	196885	1863.16
A12	19	176438	31642.3	44889.2	194499	3120.24
B1	19	495465	71540.8	46970	203367	1821.83
B2	19	481040	64678.4	47780	194180	1632.6
B3	19	533563	70839.2	61115.1	213688	1705.68
B4	19	70599.9	16418.6	57950.7	212389	2116.76
B5	19	66684.2	16643	60814.4	213201	1847.01
B6	19	74972.2	17627.5	54828.7	182874	9327.62
B7	19	335852	42357.6	60783.1	212797	2063.37
B8	19	341796	43845	62429.6	223148	1826.71
B9	19	339610	44181.3	59679.8	220166	2057.33
B10	19	180616	29626.8	58000.1	224962	1887.44
B11	19	170082	28622.6	49993.8	202435	1711.79
B12	19	171372	30758.6	49621.5	216153	4002.5
C1	19	506696	72563.7	51066.5	211741	2516.21
C2	19	507837	67984.6	53820.7	210162	2692.6
C3	19	503706	63562.6	54555.7	201579	2082.45
C4	19	81874.5	18521	62701.3	217898	3074.01
C5	19	68552.3	16175.3	60960.7	206135	1906.12
C6	19	75756.2	17443.8	64910.1	214400	2151.22
C7	19	357020	43590.1	66247.1	221772	2611.9
C8	19	354550	43183.8	64497	220866	2851.33
C9	19	361157	45834.3	63929.2	224775	2844.76
C10	19	180554	29505	59398.1	222502	3020.31
C11	19	183020	30154.3	56420.5	223158	1287.31
C12	19	199813	34741.8	55391.8	227172	2488.15
D1	19	547885	78009.9	55631	230131	2051.11
D2	19	527706	70228.3	57105.7	222777	0
D3	19	551491	70200.6	63287.4	228984	3786.08
D4	19	150091	34612.3	77681	248575	6078.36
D5	19	107968	23950.1	76360.7	253960	2726.62
D6	19	107241	23686.8	77634.4	246942	2290.03
D7	19	419338	50494.7	77326.1	248466	3639.55
D8	19	396159	48735.3	75113.7	250639	2465.91
D9	19	407875	52763.9	75438.2	255014	3674.36
D10	19	200516	32741.2	68313.3	251942	1536.85
D11	19	197925	33312	66111	261216	1516.78
D12	19	200718	35422.9	60098.8	248492	2855.84
E1	19	528058	75332.6	53781.5	222085	1447.02
E2	19	512705	69791.3	58393.5	227995	1474.15
E3	19	566973	72262.3	65561.8	238161	2432.62
E4	19	100463	23137.7	73865.8	250380	5062.31
E5	19	84146.1	21531	83359.4	287909	2032.72
E6	19	107935	24735.3	89136.4	294142	2786.6
E7	19	466431	54387	79812.3	264314	2993.17
E8	19	466946	56189.1	80358.6	273455	2699.02
E9	19	471326	58556.9	77210	264767	2857.25
E10	19	200386	32808.3	70894.2	261560	1244.49
E11	19	221147	37331.1	71858.4	281044	1829.09
E12	19	209157	35526.4	59340	245763	1579.98
F1	19	522639	77752.5	53788	223074	3179.49
F2	19	534965	74897.6	59107.1	231758	2471.89
F3	19	596742	78679.1	68518.6	252819	3568.92
F4	19	72280.8	18610.8	72097.4	258015	2398.8
F5	19	72239.4	18855.8	75414.6	261439	1828.86
F6	19	85135.2	21712.3	82831.8	279370	2265.09
F7	19	460921	57052.3	82267.4	277564	2652.06
F8	19	454267	56069.2	77785.8	268525	2419.27
F9	19	455633	57640	75354.5	262674	2526.96
F10	19	207174	33910.5	71447.1	268196	2009.14
F11	19	219868	36883.6	67522.8	263715	1697.77
F12	19	227127	39211.4	64329.2	264396	3255.06
G1	19	542969	83405	55611.9	229717	5051.14
G2	19	541762	76699	56539.5	230063	1927.56
G3	19	559696	75865.1	61548.3	235727	1539.4
G4	19	103662	22525.8	70849.1	257885	1974.98
G5	19	107714	22375.1	72143.6	258358	3896.27
G6	19	106341	21247.9	70708.6	247658	2008.17
G7	19	428968	53620.5	71853.8	251519	2167.51
G8	19	419307	53213.2	69633.3	245385	2282.17
G9	19	417095	52828.7	66844.4	242687	1369.67
G10	19	226997	36505.7	66917.4	249489	2246.74
G11	19	206456	35052	62858.3	251818	1471.04
G12	19	261034	46341.5	70091.1	252207	5177.86
H1	19	495174	79600.4	48498.5	210731	3758.58
H2	19	499878	74271.4	50231.2	210305	2354
H3	19	534717	86366.8	75801.9	256895	53456.5
H4	19	86426.3	21553.2	66192.9	247422	2150.86
H5	19	79248.7	19303	64286	234611	3037.34
H6	19	101635	22893	69900.6	243636	3983.24
H7	19	404022	51999.6	61129.3	220057	2794.37
H8	19	407999	53268.6	61887.1	223402	2243.77
H9	19	472136	63602.3	69555.7	236737	5624.91
H10	19	200310	34291.9	61495.7	242889	2004.46
H11	19	196368	35271.7	57804.2	240376	2038.83
H12	19	188004	35330.4	51634.8	217968	2348.82
A1	20	481138	73398	43773.7	195579	2628.95
A2	20	462121	65834	45489.3	185171	2562.32
A3	20	513568	68107.7	51553.9	198555	2471.62
A4	20	90623.7	19056.5	54965.4	205330	2434.06
A5	20	89344.1	19475.2	60268.3	220163	2179.12
A6	20	86185.8	17710.7	58763.7	211224	2112.83
A7	20	382853	46731	54580.5	198909	1897.27
A8	20	398265	49847.5	56743.4	207091	2402.16
A9	20	391095	50174.2	53933.4	201799	2601.98
A10	20	178003	29059.6	50116.5	194715	2573.44
A11	20	170197	28758.9	46727.5	196683	2004.35
A12	20	175710	31165.3	45078.9	193822	3368.7
B1	20	498261	71682.8	46618.1	204306	2048.46
B2	20	484446	64852.9	47533.6	194575	1208.12
B3	20	537715	71414.4	61318.6	213815	1417.1
B4	20	70720.3	16352.4	57867.5	211631	1946.55
B5	20	67094.1	16706.5	61064.7	212993	1950.58
B6	20	74905.3	17614.9	54735.4	183157	9431.37
B7	20	408154	48891.3	60918.1	213096	2187.07
B8	20	419267	50766.6	62331.4	223713	1589.09
B9	20	413921	51414.7	59938.4	219966	1908.67
B10	20	179498	29666.5	57818.3	224756	2019.35
B11	20	169226	28092.3	49669.6	202217	1759.16
B12	20	170289	30462.9	49451.7	215053	4262.46
C1	20	510943	72579	50937.7	211698	3307.59
C2	20	513223	68236.9	53699.8	210944	2742.78
C3	20	507691	63496.7	54867.4	201893	2451.91
C4	20	82069.8	18235	62740.2	218090	2721.36
C5	20	69413.8	16069.5	61199.4	205922	2118.26
C6	20	75131.7	17403.5	64965.7	214324	2264.79
C7	20	431951	50021.8	66714.2	221768	2605.53
C8	20	427116	50221.3	64611.6	221122	2188.26
C9	20	436295	53201.1	63976	225000	2422.72
C10	20	181022	29418.7	59286.8	222065	2584.01
C11	20	183103	30072.6	56200.6	222486	1570.85
C12	20	199996	34387.5	55297.2	227189	2849.08
D1	20	550982	78577.4	55613.8	230433	2341.65
D2	20	530671	70306.7	57022	222664	0
D3	20	556309	70670.2	63277.1	228701	3823.75
D4	20	150091	34784.4	77743.1	248413	5913.65
D5	20	109211	23866.5	76100.6	254195	2818.01
D6	20	108617	23706.2	77709.7	247778	2364.55
D7	20	495841	57247.4	77468.1	248456	3296.32
D8	20	468404	55872.7	75241	251531	2717.58
D9	20	485601	59820.3	75607.9	254666	3521.89
D10	20	200570	32776.1	68641.8	252056	1551.1
D11	20	198360	33482	66422.4	260923	1244.57
D12	20	200739	34974.4	59847.1	248213	2612.01
E1	20	532688	76046.6	53602.7	222136	1427.57
E2	20	517073	70085.6	58488.3	228547	1492.36
E3	20	572298	72731.5	65843.9	238700	2091.13
E4	20	100708	23212.5	73882	250522	5459.02
E5	20	84314.6	21723.4	83236.3	287769	1942.77
E6	20	108440	24731.3	89332.8	294040	3236.4
E7	20	534507	60421	80136	264175	3273.08
E8	20	542075	62933.6	80231.6	273139	2836.23
E9	20	542807	65546.5	77214.1	264568	2574.9
E10	20	200013	33103.1	70723.4	261551	1412.9
E11	20	221112	36883.5	71796.1	280661	1649.1
E12	20	209157	35756.9	59500.1	246662	1263.44
F1	20	528449	78258.9	53707.2	223778	3272.26
F2	20	538111	74983.5	58977.3	231507	2309.41
F3	20	600409	79198.3	68507.7	253659	3345.47
F4	20	72818.2	18644.2	71755.4	258032	1883.31
F5	20	73446.1	18673.1	75471.6	261921	1569.23
F6	20	84739.8	21779.4	82827	279327	1918.26
F7	20	528208	63156	82373.1	277456	2393.87
F8	20	528406	63249.1	77820.2	268586	2587.65
F9	20	528218	64721.6	75444	262159	2474.06
F10	20	208590	34302.3	71066	266923	1573.76
F11	20	220210	37044.5	67396.6	264552	1478.35
F12	20	227503	39466.5	64581.5	265279	2712.8
G1	20	544275	84256.9	55925.5	230406	4795.75
G2	20	543560	77105.2	56526.6	230440	1657.64
G3	20	562853	75938.6	61699.6	236399	1837.1
G4	20	108581	22727.4	71165.7	257239	2109.2
G5	20	111957	22802.4	72288.4	258239	3576.06
G6	20	111382	21897.8	70762.5	247784	1896.05
G7	20	496602	60441.2	72224.8	251342	2196.66
G8	20	486551	59975.3	69551	245391	1926.43
G9	20	485010	59965.7	66798.7	242496	1400.8
G10	20	225871	36119.7	66979.5	249706	2250.44
G11	20	206626	35113.4	62827.8	251929	1511.33
G12	20	259950	46228.7	70523.6	252169	4441.16
H1	20	498131	79839.8	48727.9	210099	3527.87
H2	20	502319	74521.4	50403.1	210019	1889.83
H3	20	536788	86646.7	75663.9	256767	53603.4
H4	20	85941	21480.6	66155.2	247733	1960.7
H5	20	79507.8	19108.2	64337	234122	2945.91
H6	20	101206	22782.7	69876.7	244492	4111.3
H7	20	460718	57417.4	61310.3	219728	2713.77
H8	20	464801	58997.5	62180.8	222963	2264.1
H9	20	531124	69914.5	69726.6	237011	5658.52
H10	20	200150	34235.7	61479.7	242770	1971.41
H11	20	196086	35184	57886.9	240727	1843.81
H12	20	187667	35315.4	51785.7	217622	2836.74
A1	21	483688	73244.3	44042.9	194654	1869.38
A2	21	462364	66074.6	45101	185845	2825.9
A3	21	515439	68384.2	51919.2	198928	2271.31
A4	21	90649.5	18797.6	54770.7	205318	2516.72
A5	21	89528	19407.9	60012.6	219786	1584.29
A6	21	86079.8	18064.4	58552.3	211634	2299.8
A7	21	431742	51627.3	54750.8	198593	1935.59
A8	21	448173	54926.2	56752.6	207590	2412.58
A9	21	440906	55714.4	53873.4	201456	2515.81
A10	21	177256	29105.3	50371.6	194970	2399.42
A11	21	170108	28702.1	46552.4	196431	2101.25
A12	21	176001	31039.3	45109.5	193744	3162.19
B1	21	499802	72026.5	46783	204435	2086.47
B2	21	486515	65052.4	47854.7	194156	1672.24
B3	21	541642	71590.7	61257.2	213929	1678.76
B4	21	70599.9	16433.4	57972.3	212211	2132.23
B5	21	67098.4	16832.3	61207.2	213049	1899.81
B6	21	74406.7	17486.5	54770.4	183294	9536.07
B7	21	463187	53860.3	61498.1	212733	2436.5
B8	21	477514	56276.3	62785.4	223696	1648.5
B9	21	470055	57014.9	60025.3	219977	1912.83
B10	21	179160	29501.8	58248.1	224602	2252.75
B11	21	169391	28337.1	50015.9	202125	2013.5
B12	21	171345	30399.8	49391.5	216173	4034.14
C1	21	513035	72873	50807.7	212336	2820.33
C2	21	515945	69212.6	53800.9	210817	2797.52
C3	21	510448	63696.6	54953.5	201635	2194.5
C4	21	82616.9	18196.7	63229.2	217814	3016.65
C5	21	69697.5	16322.6	61322.5	205728	2276.32
C6	21	76664.4	17295.4	64942.8	215062	2441.08
C7	21	487092	55266.3	66643.6	221614	2552.42
C8	21	480754	55283.6	64604.7	220515	2153.6
C9	21	492449	58539.5	64042.4	224425	2182.16
C10	21	180839	29213.7	59442.8	222175	2812.6
C11	21	182368	30080.3	56775.3	222882	1524.14
C12	21	199776	34336.5	55440.6	227202	2368.87
D1	21	555128	79000.4	55792	230900	2397.72
D2	21	533541	70912.4	57329.1	223498	0
D3	21	558945	70972	63566.6	229088	3675.08
D4	21	151832	35034.8	77567.3	249006	6012.47
D5	21	109454	24149.6	76376	253729	2634.21
D6	21	108967	23914.4	77805.9	247617	2091.67
D7	21	551166	62254.3	77431.3	248340	3341.31
D8	21	517270	60312.1	75094.1	251709	2400.03
D9	21	542350	65705.2	75685.2	255312	3786.82
D10	21	200353	32918.2	68450.4	251856	1561.27
D11	21	197982	33467	66430.1	261775	1222.79
D12	21	201303	35238.3	60029.1	248937	2771.08
E1	21	535499	76402.5	53947.2	222946	1483.76
E2	21	518317	69976.9	58221.5	227974	1363.8
E3	21	575193	73284.2	65991.2	238320	2374.11
E4	21	101391	23211.6	73906.9	251637	5099.68
E5	21	84770.2	21567.8	83307.4	287620	2111.21
E6	21	108899	24640.5	89372.9	293929	3085.58
E7	21	576510	64424.2	80050	264912	3107.36
E8	21	590168	67575.4	80658.3	273317	3058.29
E9	21	589248	69958.7	77318	264721	2477.97
E10	21	199633	32899.3	70814.6	262224	1189.65
E11	21	221883	36996	72040.5	281379	1401
E12	21	211021	35592.8	59480.8	246197	1803.34
F1	21	530668	78187.3	53745	223868	2648.31
F2	21	541703	75180.9	59026	232227	2239.17
F3	21	605152	79636.8	68773	252687	3526.01
F4	21	72351.5	18621.6	71834.2	257650	2210.73
F5	21	72947.2	18506.7	75349.6	261677	1485.95
F6	21	85700.1	21757.1	82949.3	279354	2456.36
F7	21	573036	67138.4	82578.9	277490	2458.42
F8	21	577043	68000.1	77755.5	268464	2585.94
F9	21	576985	69709.5	75342.9	262539	2538.62
F10	21	207559	33905.1	71657.7	268242	1586.01
F11	21	220465	36749.4	67415.4	264212	2023.9
F12	21	227714	39452.1	64677.1	264612	2811.8
G1	21	546981	84471	55919.6	229640	4491.03
[truncated: 10,967 more rows]
