# Supplementary material for: DLX1 acts as a novel prognostic biomarker involved in immune cell infiltration and tumor progression in lung adenocarcinoma
Source: PeerJ. 2024 Feb 2;12:e16823. doi: 10.7717/peerj.16823 (PMC10840498; doi:10.7717/peerj.16823)
Supplement: Supplemental Information 10 [file peerj-12-16823-s010.xlsx]

## Sheet: Sheet1
Date of the experiment	20231125
Cell lines	Reference gene（actin）	Target gene(DLX1)	Reference gene-Target gene	∆CT	∆∆CT	Result
A549-NC	16.3433	33.5008	17.1574	17.1614	-0.00395139	1.00274
A549-NC	16.5029	33.7392	17.2363		0.074906	0.949404
A549-NC	16.5596	33.65	17.0904		-0.0709546	1.05041
A549-D1	16.3266	33.5331	17.2065		0.0451419	0.969195
A549-D1	16.4333	34.3689	17.9356		0.774174	0.584723
A549-D1	16.3964	33.4726	17.0762		-0.0852083	1.06084
A549-D2	16.2965	33.1633	16.8668		-0.29458	1.22653
A549-D2	16.2463	34.2141	17.9679		0.8065	0.571767
A549-D2	16.2598	34.0576	17.7978		0.63641	0.643312
A549-D6	16.1756	34.8513	18.6757		1.51429	0.350068
A549-D6	16.1168	34.6475	18.5306		1.36926	0.387089
A549-D6	16.1503	34.797	18.6466		1.48524	0.357189
H1299-NC	15.7904	29.3989	13.6085	13.9131	-0.304593	1.23507
H1299-NC	15.8628	29.7855	13.9227		0.00962607	0.99335
H1299-NC	15.9391	30.1471	14.208		0.294967	0.815091
H1299-D1	15.9083	30.1719	14.2636		0.350555	0.784282
H1299-D1	15.8897	31.143	15.2533		1.34026	0.394949
H1299-D1	15.9883	30.9949	15.0066		1.09351	0.468621
H1299-D2	15.8903	30.9976	15.1074		1.19428	0.437004
H1299-D2	15.9148	30.9384	15.0235		1.11047	0.463144
H1299-D2	15.9609	30.9409	14.98		1.06697	0.477321
H1299-D6	15.5886	31.0705	15.482		1.56889	0.337067
H1299-D6	15.614	31.1262	15.5122		1.59914	0.330073
H1299-D6	15.7333	30.6163	14.883		0.969906	0.510539
