# Supplementary material for: DLX1 acts as a novel prognostic biomarker involved in immune cell infiltration and tumor progression in lung adenocarcinoma
Source: PeerJ. 2024 Feb 2;12:e16823. doi: 10.7717/peerj.16823 (PMC10840498; doi:10.7717/peerj.16823)
Supplement: Supplemental Information 11 [file peerj-12-16823-s011.xlsx]

## Sheet: Sheet1
H1299 Migration	NC	DLX1 si#1	DLX1 si#2			H1299 Invasion	NC	DLX1 si#1	DLX1 si#2
							294	144	154
	425	195	179				312	136	163
	420	189	200				308	133	157
	387	170	189
A549 Migration	NC	DLX1 si#1	DLX1 si#2			A549 Invasion	NC	DLX1 si#1	DLX1 si#2
	614	99	51				165	64	37
	620	117	65				167	57	30
	609	115	67				175	52	36
